# Supplementary material
Source: PubMed Central journal article supplement (PMC137978)
Supplement: nar_30_23_5293__1.pdf [file nar_30_23_5293__1.pdf]

## SUPPLEMENTARY MATERIAL

Appendix Annotation table of the *M. penetrans* genome

| Type | MYPE No. | COG | General name | Definition                                                                                                                                                                 |
|------|----------|-----|--------------|----------------------------------------------------------------------------------------------------------------------------------------------------------------------------|
| CDS  | MYPE10   | L   | <i>dnaA</i>  | chromosomal replication initiator protein                                                                                                                                  |
| CDS  | MYPE20   | L   | <i>dnaN</i>  | DNA polymerase III subunit beta                                                                                                                                            |
| CDS  | MYPE30   | L   | <i>gyrB</i>  | DNA gyrase subunit B                                                                                                                                                       |
| CDS  | MYPE40   | L   | <i>gyrA</i>  | DNA gyrase subunit A                                                                                                                                                       |
| CDS  | MYPE50   | L   |              | transposase, truncated, C-terminal of MYPE9620                                                                                                                             |
| CDS  | MYPE60   | L   |              | transposase, truncated, N-terminal of MYPE9620                                                                                                                             |
| CDS  | MYPE70   | -   |              | transposase, truncated                                                                                                                                                     |
| CDS  | MYPE80   | D   | <i>soj</i>   | ParA family of ATPases involved in chromosome partition<br>Soj                                                                                                             |
| CDS  | MYPE90   | -   |              | hypothetical protein                                                                                                                                                       |
| CDS  | MYPE100  | J   | <i>cspR</i>  | rRNA methylase                                                                                                                                                             |
| CDS  | MYPE110  | -   |              | hypothetical protein, MYPE120 paralog                                                                                                                                      |
| CDS  | MYPE120  | -   |              | hypothetical protein, paralog family                                                                                                                                       |
| CDS  | MYPE130  | J   |              | pseudouridine synthase                                                                                                                                                     |
| CDS  | MYPE140  | O   |              | peroxiredoxin                                                                                                                                                              |
| CDS  | MYPE150  | -   |              | hypothetical protein                                                                                                                                                       |
| CDS  | MYPE160  | M   |              | UTP-glucose-1-phosphate uridylyltransferase                                                                                                                                |
| CDS  | MYPE170  | -   |              | transposase                                                                                                                                                                |
| CDS  | MYPE180  | -   |              | hypothetical protein                                                                                                                                                       |
| CDS  | MYPE190  | -   |              | hypothetical protein                                                                                                                                                       |
| CDS  | MYPE200  | G   | <i>pgm</i>   | phosphoglycerate mutase                                                                                                                                                    |
| CDS  | MYPE210  | G   | <i>tpiA</i>  | triose phosphate isomerase                                                                                                                                                 |
| CDS  | MYPE220  | J   | <i>cysS</i>  | cysteinyl-tRNA synthetase                                                                                                                                                  |
| CDS  | MYPE230  | J   | <i>spoU</i>  | rRNA methylase                                                                                                                                                             |
| CDS  | MYPE240  | -   |              | conserved hypothetical protein                                                                                                                                             |
| CDS  | MYPE250  | J   | <i>rplK</i>  | ribosomal protein L11                                                                                                                                                      |
| CDS  | MYPE260  | J   |              | ribosomal protein L1                                                                                                                                                       |
| CDS  | MYPE270  | M   |              | glycosyltransferase                                                                                                                                                        |
| CDS  | MYPE280  | -   |              | hypothetical protein                                                                                                                                                       |
| CDS  | MYPE290  | J   | <i>rpsL</i>  | ribosomal protein S12                                                                                                                                                      |
| CDS  | MYPE300  | J   | <i>rpsG</i>  | ribosomal protein S7                                                                                                                                                       |
| CDS  | MYPE310  | J   | <i>fusA</i>  | elongation factor G                                                                                                                                                        |
| CDS  | MYPE320  | J   | <i>tufA</i>  | elongation factor Tu                                                                                                                                                       |
| CDS  | MYPE330  | -   |              | hypothetical protein                                                                                                                                                       |
| CDS  | MYPE340  | -   |              | conserved hypothetical protein                                                                                                                                             |
| CDS  | MYPE350  | I   |              | Holo-(Acyl Carrier Protein) Synthase                                                                                                                                       |
| CDS  | MYPE360  | -   |              | hypothetical protein                                                                                                                                                       |
| CDS  | MYPE370  | I   | <i>plsC</i>  | 1-acyl-sn-glycerol-3-phosphate acyltransferase                                                                                                                             |
| CDS  | MYPE380  | S   |              | conserved hypothetical protein                                                                                                                                             |
| CDS  | MYPE390  | K   |              | conserved hypothetical protein                                                                                                                                             |
| CDS  | MYPE400  | -   |              | conserved hypothetical protein                                                                                                                                             |
| CDS  | MYPE410  | R   |              | predicted GTP-binding protein                                                                                                                                              |
| CDS  | MYPE420  | J   | <i>valS</i>  | valyl-tRNA synthetase                                                                                                                                                      |
| CDS  | MYPE430  | R   |              | predicted competence protein                                                                                                                                               |
| CDS  | MYPE440  | -   |              | conserved hypothetical protein                                                                                                                                             |
| CDS  | MYPE450  | L   |              | conserved hypothetical protein                                                                                                                                             |
| CDS  | MYPE460  | -   |              | putative integral membrane protein                                                                                                                                         |
| CDS  | MYPE470  | -   |              | putative integral membrane protein, similar to cytoadherence-accessory protein HMW1 homologue of <i>Mycoplasma genitalium</i> MG313, F64234 Expect=2.5e-18, Identities=30% |

|     |          |   |                      |                                                            |
|-----|----------|---|----------------------|------------------------------------------------------------|
| CDS | MYPE480  | J | <i>rpsT</i>          | ribosomal protein S20                                      |
| CDS | MYPE490  | - |                      | conserved hypothetical protein                             |
| CDS | MYPE500  | J | <i>fmt</i>           | methionyl-tRNA formyltransferase                           |
| CDS | MYPE510  | N | <i>lepA</i>          | GTP-binding membrane protein                               |
| CDS | MYPE520  | F | <i>pyrG</i>          | CTP synthetase                                             |
| CDS | MYPE530  | R |                      | predicted GTPase, containing MMR_HSR1 domain               |
| CDS | MYPE540  | - |                      | conserved hypothetical protein                             |
| CDS | MYPE550  | - |                      | hypothetical protein                                       |
| CDS | MYPE560  | C | <i>atpB</i>          | ATP synthase subunit A                                     |
| CDS | MYPE570  | C | <i>atpE</i>          | ATP synthase subunit C                                     |
| CDS | MYPE580  | C | <i>atpF</i>          | ATP synthase subunit B                                     |
| CDS | MYPE590  | C | <i>atpH</i>          | ATP synthase subunit delta                                 |
| CDS | MYPE600  | C | <i>atpA</i>          | ATP synthase subunit alpha                                 |
| CDS | MYPE610  | C | <i>atpG</i>          | ATP synthase subunit gamma                                 |
| CDS | MYPE620  | C | <i>atpD</i>          | ATP synthase subunit beta                                  |
| CDS | MYPE630  | C | <i>atpC</i>          | ATP synthase subunit epsilon                               |
| CDS | MYPE640  | J | <i>rpmE</i>          | ribosomal protein L31                                      |
| CDS | MYPE650  | J | <i>prfA</i>          | peptide chain release factor 1                             |
| CDS | MYPE660  | J | <i>hemK</i>          | S-adenosylmethionine-dependent methyltransferase HemK      |
| CDS | MYPE670  | J |                      | predicted translation factor Sua5/YciO/YrdC family protein |
| CDS | MYPE680  | G | <i>rpiB/lacA/lac</i> | ribose 5-phosphate and galactose-6-phosphate isomerase     |
| CDS | MYPE690  | K |                      | putative two-component response regulator                  |
| CDS | MYPE700  | R |                      | predicted intracellular protease ThiJ family               |
| CDS | MYPE710  | K | <i>hrcA</i>          | heat-inducible transcription repressor                     |
| CDS | MYPE720  | - |                      | hypothetical protein                                       |
| CDS | MYPE730  | G |                      | deoxyxylulose-5-phosphate synthase                         |
| CDS | MYPE740  | L |                      | conserved hypothetical protein                             |
| CDS | MYPE750  | - |                      | hypothetical protein                                       |
| CDS | MYPE760  | O | <i>nifU</i>          | nitrogen fixation protein NifU                             |
| CDS | MYPE770  | G | <i>tkt</i>           | transketolase TKT                                          |
| CDS | MYPE780  | G | <i>pyk</i>           | pyruvate kinase                                            |
| CDS | MYPE790  | K | <i>rpoB</i>          | DNA-directed RNA polymerase subunit beta                   |
| CDS | MYPE800  | K | <i>rpoC</i>          | DNA-directed RNA polymerase subunit beta'                  |
| CDS | MYPE810  | J | <i>rplM</i>          | ribosomal protein L13                                      |
| CDS | MYPE820  | J | <i>rplI</i>          | ribosomal protein S9                                       |
| CDS | MYPE830  | - |                      | hypothetical protein                                       |
| CDS | MYPE835  | - |                      | hypothetical protein                                       |
| CDS | MYPE840  | R |                      | predicted haloacid dehalogenase-like hydrolase             |
| CDS | MYPE850  | F | <i>nrdE</i>          | ribonucleoside diphosphate reductase subunit alpha         |
| CDS | MYPE860  | F | <i>nrdI</i>          | ribonucleotide reductase NrdI                              |
| CDS | MYPE870  | F | <i>nrdF</i>          | ribonucleotide diphosphate reductase subunit beta          |
| CDS | MYPE880  | R |                      | predicted permeases, MYPE890 paralog                       |
| CDS | MYPE890  | - |                      | predicted permeases, paralog family                        |
| CDS | MYPE900  | Q |                      | conserved hypothetical protein                             |
| CDS | MYPE910  | - |                      | putative membrane integrated oxidoreductase                |
| CDS | MYPE920  | - |                      | hypothetical protein                                       |
| CDS | MYPE930  | - |                      | hypothetical protein                                       |
| CDS | MYPE940  | H | <i>metK</i>          | S-adenosylmethionine synthetase                            |
| CDS | MYPE950  | - |                      | hypothetical protein, paralog family                       |
| CDS | MYPE960  | Q |                      | ABC transporter ATP-binding protein, paralog family        |
| CDS | MYPE970  | R |                      | predicted integral membrane protein                        |
| CDS | MYPE980  | O | <i>groES</i>         | chaperonin GroES                                           |
| CDS | MYPE990  | O | <i>groES</i>         | chaperonin GroEL                                           |
| CDS | MYPE1000 | F |                      | deoxyuridine 5'triphosphate nucleotidohydrolase dUTPase    |
| CDS | MYPE1010 | J | <i>rpsP</i>          | ribosomal protein S16                                      |
| CDS | MYPE1020 | J | <i>trmD</i>          | tRNA (guanine-N1)-methyltransferase                        |

|     |          |   |             |                                                                                                                  |
|-----|----------|---|-------------|------------------------------------------------------------------------------------------------------------------|
| CDS | MYPE1030 | J | <i>rplS</i> | ribosomal protein L19                                                                                            |
| CDS | MYPE1035 | - |             | predicted coding region                                                                                          |
| CDS | MYPE1040 | F | <i>pnp</i>  | purine nucleoside phosphorylase                                                                                  |
| CDS | MYPE1050 | F | <i>deoA</i> | thymidine phosphorylase                                                                                          |
| CDS | MYPE1060 | F | <i>cdd</i>  | cytidine deaminase                                                                                               |
| CDS | MYPE1070 | G | <i>manB</i> | phosphomannomutase                                                                                               |
| CDS | MYPE1080 | - |             | hypothetical protein                                                                                             |
| CDS | MYPE1090 | K | <i>nusA</i> | N-utilization substance protein A                                                                                |
| CDS | MYPE1100 | - |             | hypothetical protein                                                                                             |
| CDS | MYPE1110 | J | <i>infB</i> | translation initiation factor IF-2                                                                               |
| CDS | MYPE1120 | J |             | ribosome binding factor A                                                                                        |
| CDS | MYPE1130 | - |             | conserved hypothetical protein                                                                                   |
| CDS | MYPE1140 | J | <i>rpsF</i> | ribosomal protein S6                                                                                             |
| CDS | MYPE1150 | L | <i>ssb</i>  | single-strand DNA binding protein                                                                                |
| CDS | MYPE1160 | J | <i>rpsR</i> | ribosomal protein S18                                                                                            |
| CDS | MYPE1170 | F | <i>deoC</i> | deoxyribose-phosphate aldolase                                                                                   |
| CDS | MYPE1180 | R |             | conserved hypothetical protein, similar to hydrolase                                                             |
| CDS | MYPE1190 | L | <i>nfo</i>  | endonuclease IV                                                                                                  |
| CDS | MYPE1200 | P | <i>fur</i>  | ferric uptake regulation protein                                                                                 |
| CDS | MYPE1210 | - |             | integral membrane protein predicted transporter                                                                  |
| CDS | MYPE1220 | F | <i>guaA</i> | GMP synthase                                                                                                     |
| CDS | MYPE1230 | L | <i>dam</i>  | adenine-specific DNA methyltransferase                                                                           |
| CDS | MYPE1240 | L |             | transposase for IS1630-like insertion sequence element                                                           |
| CDS | MYPE1250 | - |             | conserved hypothetical protein                                                                                   |
| CDS | MYPE1260 | L | <i>uvrC</i> | excinuclease ABC subunit C                                                                                       |
| CDS | MYPE1270 | L |             | exonuclease, possibly DNA polymerase III                                                                         |
| CDS | MYPE1280 | R |             | predicted phosphoesterase                                                                                        |
| CDS | MYPE1290 | R |             | ribosomal protein-alanine-acetyltransferase                                                                      |
| CDS | MYPE1300 | O |             | conserved hypothetical protein                                                                                   |
| CDS | MYPE1310 | J | <i>rluB</i> | pseudouridine synthase                                                                                           |
| CDS | MYPE1320 | N | <i>lsp</i>  | prolipoprotein signal peptidase                                                                                  |
| CDS | MYPE1330 | I |             | lytB protein                                                                                                     |
| CDS | MYPE1340 | G | <i>ptsG</i> | PTS system glucose-specific enzyme II ABC component                                                              |
| CDS | MYPE1350 | - |             | hypothetical protein                                                                                             |
| CDS | MYPE1370 | - |             | conserved hypothetical protein                                                                                   |
| CDS | MYPE1380 | - |             | conserved hypothetical protein                                                                                   |
| CDS | MYPE1390 | O | <i>trxB</i> | thioredoxin reductase                                                                                            |
| CDS | MYPE1400 | R |             | predicted methyltransferase                                                                                      |
| CDS | MYPE1410 | - |             | hypothetical protein                                                                                             |
| CDS | MYPE1420 | L |             | ATP/GTP-binding protein, predicted ATPase                                                                        |
| CDS | MYPE1430 | - |             | conserved hypothetical protein                                                                                   |
| CDS | MYPE1440 | - |             | conserved hypothetical protein                                                                                   |
| CDS | MYPE1450 | J | <i>pth</i>  | peptidyl-tRNA hydrolase                                                                                          |
| CDS | MYPE1460 | D |             | predicted cell cycle protein MesJ/ ATPase of the PP-loop superfamily                                             |
| CDS | MYPE1470 | I |             | 1-deoxy-D-xylulose 5-phosphate reductoisomerase                                                                  |
| CDS | MYPE1480 | E | <i>asnA</i> | asparagine synthetase A                                                                                          |
| CDS | MYPE1490 | L | <i>mucB</i> | DNA-damage repair protein MucB                                                                                   |
| CDS | MYPE1500 | J |             | hemolysin                                                                                                        |
| CDS | MYPE1510 | - |             | hypothetical protein                                                                                             |
| CDS | MYPE1520 | - |             | predicted coiled-coil structure containing protein                                                               |
| CDS | MYPE1530 | - |             | predicted cytoskeletal protein, coiled-coil structure containing protein                                         |
| CDS | MYPE1540 | - |             | predicted coiled-coil structure containing protein                                                               |
| CDS | MYPE1550 | D |             | predicted cytoskeletal protein, ortholog of cytoskeletal protein HMW2 of <i>M. pneumoniae</i> MPN310, NP_109998, |

|     |          |   |             |                                                                                                                                                                                                                     |
|-----|----------|---|-------------|---------------------------------------------------------------------------------------------------------------------------------------------------------------------------------------------------------------------|
|     |          |   |             | (SwissProt HMW2_MYCPN), predicted coiled-coil structure containing protein                                                                                                                                          |
| CDS | MYPE1560 | - |             | predicted cytoskeletal protein, predicted coiled-coil structure containing protein                                                                                                                                  |
| CDS | MYPE1570 | - |             | predicted cytoskeletal protein, similar to cytoskeletal protein HMW2 homolog MG218 of <i>M. genitalium</i> U39701, Expect = 1.1e-20, Identities = 152/631 (24%), predicted coiled-coil structure containing protein |
| CDS | MYPE1580 | J | <i>efp</i>  | translation elongation factor P                                                                                                                                                                                     |
| CDS | MYPE1590 | - |             | low similarity to ATP synthase subunit gamma                                                                                                                                                                        |
| CDS | MYPE1600 | K | <i>nusB</i> | transcription termination factor N-utilization substance protein B                                                                                                                                                  |
| CDS | MYPE1610 | S |             | conserved hypothetical protein                                                                                                                                                                                      |
| CDS | MYPE1620 | - |             | conserved hypothetical protein                                                                                                                                                                                      |
| CDS | MYPE1630 | J |             | conserved hypothetical protein                                                                                                                                                                                      |
| CDS | MYPE1640 | P |             | conserved hypothetical protein                                                                                                                                                                                      |
| CDS | MYPE1650 | - |             | conserved hypothetical protein                                                                                                                                                                                      |
| CDS | MYPE1660 | - |             | conserved hypothetical protein                                                                                                                                                                                      |
| CDS | MYPE1670 | D | <i>gidA</i> | glucose inhibited division protein                                                                                                                                                                                  |
| CDS | MYPE1680 | - |             | hypothetical protein                                                                                                                                                                                                |
| CDS | MYPE1690 | R | <i>nox</i>  | NADH oxidase                                                                                                                                                                                                        |
| CDS | MYPE1700 | R | <i>nodL</i> | acetyl transferase                                                                                                                                                                                                  |
| CDS | MYPE1710 | O | <i>trxA</i> | thioredoxin                                                                                                                                                                                                         |
| CDS | MYPE1720 | K |             | transcriptional regulator RpiR family                                                                                                                                                                               |
| CDS | MYPE1730 | G | <i>ptsG</i> | PTS system glucose-specific IIABC component                                                                                                                                                                         |
| CDS | MYPE1740 | G |             | N-acetylmannosamine 6-P epimerase                                                                                                                                                                                   |
| CDS | MYPE1750 | G | <i>nagA</i> | N-acetylglucosamine 6-P deacetylase                                                                                                                                                                                 |
| CDS | MYPE1760 | G | <i>nagB</i> | N-acetylglucosamine 6-phosphate isomerase                                                                                                                                                                           |
| CDS | MYPE1770 | - |             | hypothetical protein                                                                                                                                                                                                |
| CDS | MYPE1780 | L | <i>dam</i>  | adenine-specific DNA methyltransferase                                                                                                                                                                              |
| CDS | MYPE1790 | L | <i>dam</i>  | adenine-specific DNA methyltransferase                                                                                                                                                                              |
| CDS | MYPE1800 | - |             | conserved hypothetical protein                                                                                                                                                                                      |
| CDS | MYPE1810 | S |             | conserved hypothetical protein                                                                                                                                                                                      |
| CDS | MYPE1820 | - | <i>ecsB</i> | ABC transporter membrane protein                                                                                                                                                                                    |
| CDS | MYPE1830 | - |             | conserved hypothetical protein                                                                                                                                                                                      |
| CDS | MYPE1840 | L | <i>ligA</i> | NAD-dependent DNA ligase                                                                                                                                                                                            |
| CDS | MYPE1850 | L |             | 6-O-methylguanine DNA methyltransferase                                                                                                                                                                             |
| CDS | MYPE1860 | S |             | hypothetical protein                                                                                                                                                                                                |
| CDS | MYPE1870 | - |             | hypothetical protein                                                                                                                                                                                                |
| CDS | MYPE1880 | Q | <i>ecsA</i> | ABC transporter ATP-binding protein, MYPE3080 paralog                                                                                                                                                               |
| CDS | MYPE1890 | I | <i>acpD</i> | acyl carrier protein phosphodiesterase                                                                                                                                                                              |
| CDS | MYPE1900 | - |             | hypothetical protein                                                                                                                                                                                                |
| CDS | MYPE1910 | J |             | hypothetical protein                                                                                                                                                                                                |
| CDS | MYPE1920 | - |             | conserved hypothetical protein                                                                                                                                                                                      |
| CDS | MYPE1930 | R | <i>obg</i>  | GTP-binding protein Obg                                                                                                                                                                                             |
| CDS | MYPE1940 | H | <i>nade</i> | NH(3)-dependent NAD+ synthetase                                                                                                                                                                                     |
| CDS | MYPE1950 | - |             | putative integral membrane protein, low similarity to P1-like adhesin precursor of <i>Mycoplasma pirum</i> L19685<br>Expect=6.3e-03, Identities=19%                                                                 |
| CDS | MYPE1960 | - |             | hypothetical protein                                                                                                                                                                                                |
| CDS | MYPE1970 | - |             | hypothetical protein                                                                                                                                                                                                |
| CDS | MYPE1980 | L | <i>dnaE</i> | DNA polymerase III subunit alpha                                                                                                                                                                                    |
| CDS | MYPE1990 | L | <i>polI</i> | DNA polymerase I: 5'-3' exonuclease                                                                                                                                                                                 |
| CDS | MYPE2000 | L | <i>fpg</i>  | formamidopyrimidine-DNA glycosylase                                                                                                                                                                                 |
| CDS | MYPE2010 | H |             | conserved hypothetical protein                                                                                                                                                                                      |
| CDS | MYPE2020 | L |             | conserved hypothetical protein                                                                                                                                                                                      |
| CDS | MYPE2030 | L |             | primosome component                                                                                                                                                                                                 |

|     |          |   |             |                                                                                         |
|-----|----------|---|-------------|-----------------------------------------------------------------------------------------|
| CDS | MYPE2040 | O |             | conserved hypothetical protein                                                          |
| CDS | MYPE2050 | L | <i>dnaB</i> | replicative DNA helicase                                                                |
| CDS | MYPE2060 | - |             | hypothetical protein                                                                    |
| CDS | MYPE2070 | L | <i>udg</i>  | uracil-DNA glycosylase                                                                  |
| CDS | MYPE2080 | - |             | glutamyl-tRNA amidotransferase subunit C-related protein                                |
| CDS | MYPE2090 | J | <i>gatC</i> | glutamyl-tRNA amidotransferase subunit C                                                |
| CDS | MYPE2100 | J | <i>gatA</i> | glutamyl-tRNA amidotransferase subunit A                                                |
| CDS | MYPE2110 | J | <i>gatB</i> | glutamyl-tRNA amidotransferase subunit B                                                |
| CDS | MYPE2120 | S |             | conserved hypothetical protein                                                          |
| CDS | MYPE2130 | P | <i>pacL</i> | cation-transporting P-type ATPase                                                       |
| CDS | MYPE2140 | - |             | hypothetical protein, paralog family                                                    |
| CDS | MYPE2150 | - |             | hypothetical protein, MYPE2140 paralog                                                  |
| CDS | MYPE2160 | - |             | hypothetical protein, MYPE2140 paralog                                                  |
| CDS | MYPE2170 | L |             | Insertion sequence IS232 putative ATP-binding protein                                   |
| CDS | MYPE2180 | - |             | transposase for IS232-like insertion sequence element                                   |
| CDS | MYPE2190 | P |             | hypothetical protein                                                                    |
| CDS | MYPE2200 | Q |             | ABC transporter ATP-binding protein                                                     |
| CDS | MYPE2210 | Q |             | ABC transporter ATP-binding protein                                                     |
| CDS | MYPE2220 | - |             | conserved hypothetical protein                                                          |
| CDS | MYPE2230 | - |             | hypothetical protein                                                                    |
| CDS | MYPE2240 | - |             | conserved hypothetical protein                                                          |
| CDS | MYPE2250 | R |             | conserved hypothetical protein, MYPE4220 paralog                                        |
| CDS | MYPE2260 | - |             | hypothetical protein                                                                    |
| CDS | MYPE2270 | - |             | hypothetical protein                                                                    |
| CDS | MYPE2280 | F | <i>cmk</i>  | cytidylate kinase                                                                       |
| CDS | MYPE2290 | R |             | predicted ATP/GTP-binding protein                                                       |
| CDS | MYPE2300 | C | <i>gpsA</i> | NAD-dependent glycerol-3-phosphate dehydrogenase                                        |
| CDS | MYPE2310 | - |             | transposase for IS1202-like insertion sequence element                                  |
| CDS | MYPE2330 | S |             | conserved hypothetical protein                                                          |
| CDS | MYPE2340 | - |             | transposase                                                                             |
| CDS | MYPE2350 | - |             | predicted integral membrane protein, MYPE2360 paralog                                   |
| CDS | MYPE2360 | - |             | predicted integral membrane protein, low similarity to histidine kinase, paralog family |
| CDS | MYPE2370 | - |             | predicted integral membrane protein, MYPE2360 paralog                                   |
| CDS | MYPE2380 | - |             | predicted integral membrane protein, MYPE2360 paralog                                   |
| CDS | MYPE2390 | - |             | hypothetical protein                                                                    |
| CDS | MYPE2400 | - |             | predicted integral membrane protein, MYPE2360 paralog                                   |
| CDS | MYPE2410 | - |             | predicted integral membrane protein, MYPE2360 paralog                                   |
| CDS | MYPE2420 | - |             | predicted integral membrane protein                                                     |
| CDS | MYPE2430 | - |             | predicted integral membrane protein                                                     |
| CDS | MYPE2440 | - |             | conserved hypothetical protein                                                          |
| CDS | MYPE2450 | - |             | predicted integral membrane protein                                                     |
| CDS | MYPE2460 | R |             | recombination protein U                                                                 |
| CDS | MYPE2470 | Q |             | ABC transporter ATP-binding protein, paralog family                                     |
| CDS | MYPE2480 | Q |             | ABC transporter ATP-binding protein                                                     |
| CDS | MYPE2490 | L | <i>hupA</i> | DNA-binding histone-like protein HU-alpha                                               |
| CDS | MYPE2500 | - |             | predicted integral membrane protein                                                     |
| CDS | MYPE2510 | - |             | conserved hypothetical protein                                                          |
| CDS | MYPE2520 | - |             | conserved hypothetical protein                                                          |
| CDS | MYPE2530 | N | <i>ffh</i>  | signal recognition particle GTPase Ffh                                                  |
| CDS | MYPE2540 | M |             | predicted Zn-dependent protease                                                         |
| CDS | MYPE2545 | R |             | conserved hypothetical protein, MYPE2560 paralog, partial                               |
| CDS | MYPE2550 | - |             | conserved hypothetical protein, MYPE2560 paralog, partial                               |
| CDS | MYPE2560 | - |             | conserved hypothetical protein, paralog family                                          |
| CDS | MYPE2570 | K |             | conserved hypothetical protein                                                          |

|     |          |   |             |                                                                                                                                   |
|-----|----------|---|-------------|-----------------------------------------------------------------------------------------------------------------------------------|
| CDS | MYPE2580 | - |             | conserved hypothetical protein, MYPE2560 paralog                                                                                  |
| CDS | MYPE2590 | J |             | acetyltransferase GNAT family                                                                                                     |
| CDS | MYPE2600 | J |             | acetyltransferase GNAT family                                                                                                     |
| CDS | MYPE2610 | - |             | hypothetical protein, MYPE2560 paralog                                                                                            |
| CDS | MYPE2620 | - |             | P35 lipoprotein homologue                                                                                                         |
| CDS | MYPE2630 | - |             | P35 lipoprotein homologue                                                                                                         |
| CDS | MYPE2640 | R |             | permease                                                                                                                          |
| CDS | MYPE2650 | E |             | D-lactate dehydrogenase, D-LDH                                                                                                    |
| CDS | MYPE2660 | - |             | conserved hypothetical protein, MYPE2560 paralog                                                                                  |
| CDS | MYPE2670 | - |             | conserved hypothetical protein, MYPE2560 paralog                                                                                  |
| CDS | MYPE2680 | - |             | conserved hypothetical protein, MYPE2560 paralog                                                                                  |
| CDS | MYPE2690 | - |             | P35 lipoprotein homologue                                                                                                         |
| CDS | MYPE2700 | - |             | P35 lipoprotein homologue                                                                                                         |
| CDS | MYPE2710 | - |             | conserved hypothetical protein, MYPE2560 paralog                                                                                  |
| CDS | MYPE2715 | - |             | hypothetical protein                                                                                                              |
| CDS | MYPE2720 | - |             | conserved hypothetical protein                                                                                                    |
| CDS | MYPE2730 | E |             | serine hydroxymethyl transferase                                                                                                  |
| CDS | MYPE2740 | J | <i>thrS</i> | threonyl-tRNA synthetase                                                                                                          |
| CDS | MYPE2750 | S |             | conserved hypothetical protein                                                                                                    |
| CDS | MYPE2760 | - |             | conserved hypothetical protein                                                                                                    |
| CDS | MYPE2770 | I |             | cytidine diphosphocholine pyrophosphorylase                                                                                       |
| CDS | MYPE2780 | L | <i>ruvB</i> | holliday junction DNA helicase RuvB                                                                                               |
| CDS | MYPE2790 | L | <i>ruvA</i> | holliday junction DNA helicase RuvA                                                                                               |
| CDS | MYPE2800 | G | <i>ptsH</i> | histidine-containing phosphocarrier protein of the PTS                                                                            |
| CDS | MYPE2810 | I | <i>cls</i>  | cardiolipin synthase                                                                                                              |
| CDS | MYPE2820 | E | <i>pepF</i> | oligoendopeptidase F                                                                                                              |
| CDS | MYPE2830 | - |             | hypothetical protein                                                                                                              |
| CDS | MYPE2840 | - |             | hypothetical protein                                                                                                              |
| CDS | MYPE2850 | - |             | hypothetical protein                                                                                                              |
| CDS | MYPE2860 | J | <i>hisS</i> | histidyl-tRNA synthetase                                                                                                          |
| CDS | MYPE2870 | J | <i>aspS</i> | aspartyl-tRNA synthetase                                                                                                          |
| CDS | MYPE2880 | R |             | predicted S-adenosylmethionine-dependent methyltransferase                                                                        |
| CDS | MYPE2890 | - |             | conserved hypothetical protein                                                                                                    |
| CDS | MYPE2900 | L |             | integrase-recombinase protein                                                                                                     |
| CDS | MYPE2910 | - |             | conserved hypothetical protein                                                                                                    |
| CDS | MYPE2920 | - |             | conserved hypothetical protein                                                                                                    |
| CDS | MYPE2930 | P |             | ferritin-like protein Rsg                                                                                                         |
| CDS | MYPE2940 | - |             | hypothetical prottein, similar to beta-glycosidase lacS of <i>Sulfolobus solfataricus</i> AE006893 Expect=7.5e-01, Identities=35% |
| CDS | MYPE2950 | R |             | predicted NADPH-dependent reductase                                                                                               |
| CDS | MYPE2960 | K |             | transcriptional regulator MarR family                                                                                             |
| CDS | MYPE2970 | - |             | predicted MutT/ NUDIX hydrolases                                                                                                  |
| CDS | MYPE2980 | - |             | hypothetical protein                                                                                                              |
| CDS | MYPE2990 | T | <i>hprK</i> | HPr serine/threonine protein kinase                                                                                               |
| CDS | MYPE3000 | M | <i>lgt</i>  | prolipoprotein diacylglyceryl transferase                                                                                         |
| CDS | MYPE3010 | P | <i>trkA</i> | potassium uptake protein KtrA                                                                                                     |
| CDS | MYPE3020 | R |             | putative integral membrane protein                                                                                                |
| CDS | MYPE3030 | Q |             | ABC transporter ATP-binding protein                                                                                               |
| CDS | MYPE3040 | - |             | conserved hypothetical protein                                                                                                    |
| CDS | MYPE3050 | G | <i>rpe</i>  | d-ribulose-5-phosphate 3 epimerase                                                                                                |
| CDS | MYPE3060 | R |             | conserved hypothetical protein                                                                                                    |
| CDS | MYPE3070 | - |             | putative integral membrane protein                                                                                                |
| CDS | MYPE3080 | Q |             | ABC transporter ATP-binding protein, paralog family                                                                               |
| CDS | MYPE3090 | - |             | conserved hypothetical protein                                                                                                    |
| CDS | MYPE3100 | - |             | hypothetical protein                                                                                                              |

|     |          |   |             |                                                       |
|-----|----------|---|-------------|-------------------------------------------------------|
| CDS | MYPE3110 | R |             | ortholog of YwnB of <i>Bacillus subtilis</i>          |
| CDS | MYPE3120 | K |             | ortholog of YwnA of <i>Bacillus subtilis</i>          |
| CDS | MYPE3130 | M |             | predicted choline kinase                              |
| CDS | MYPE3140 | - |             | conserved hypothetical protein, MYPE2560 paralog      |
| CDS | MYPE3150 | F | <i>guaB</i> | inosine-5'-monophosphate dehydrogenase                |
| CDS | MYPE3155 | - |             | hypothetical protein                                  |
| CDS | MYPE3160 | I |             | 3-hydroxyisobutyrate dehydrogenase                    |
| CDS | MYPE3170 | R |             | HAD superfamily hydrolase                             |
| CDS | MYPE3180 | G | <i>nagB</i> | glucosamine-6-phosphate isomerase                     |
| CDS | MYPE3190 | - |             | predicted integral membrane protein                   |
| CDS | MYPE3200 | L |             | DNA-3-methyladenine glycosidase I                     |
| CDS | MYPE3210 | - |             | predicted integral membrane protein                   |
| CDS | MYPE3220 | M |             | methyltransferase                                     |
| CDS | MYPE3230 | - |             | conserved hypothetical protein                        |
| CDS | MYPE3240 | P | <i>pacL</i> | cation-transporting p-type ATPase                     |
| CDS | MYPE3250 | P |             | cation-transporting p-type ATPase                     |
| CDS | MYPE3260 | O | <i>trxA</i> | thioredoxin                                           |
| CDS | MYPE3270 | M |             | large-conductance mechanosensitive channel            |
| CDS | MYPE3280 | - |             | hypothetical protein                                  |
| CDS | MYPE3290 | - |             | hypothetical protein                                  |
| CDS | MYPE3300 | N | <i>secG</i> | predicted protein-export protein SecG                 |
| CDS | MYPE3310 | K |             | 3'-5' exoribonuclease RNase R                         |
| CDS | MYPE3320 | G |             | dihydroxyacetone kinase                               |
| CDS | MYPE3330 | G |             | dihydroxyacetone kinase                               |
| CDS | MYPE3340 | S | <i>ptsI</i> | PTS system enzyme I                                   |
| CDS | MYPE3350 | R |             | conserved hypothetical protein                        |
| CDS | MYPE3360 | M | <i>dgkA</i> | diacylglycerol kinase                                 |
| CDS | MYPE3370 | R | <i>era</i>  | GTP-binding protein Era homolog                       |
| CDS | MYPE3380 | L |             | conserved hypothetical protein                        |
| CDS | MYPE3390 | J | <i>glyS</i> | glycyl-tRNA synthetase                                |
| CDS | MYPE3400 | L | <i>dnaG</i> | DNA primase                                           |
| CDS | MYPE3410 | - |             | hypothetical protein, MYPE8480 paralog                |
| CDS | MYPE3420 | - |             | hypothetical protein, MYPE8480 paralog                |
| CDS | MYPE3430 | - |             | hypothetical protein, MYPE8480 paralog                |
| CDS | MYPE3440 | - |             | putative integral membrane protein                    |
| CDS | MYPE3450 | E |             | amino acid permease                                   |
| CDS | MYPE3460 | - |             | hypothetical protein                                  |
| CDS | MYPE3490 | R |             | ABC transporter ATP-binding protein, MYPE3080 paralog |
| CDS | MYPE3500 | F | <i>hit</i>  | histidine triad protein HIT                           |
| CDS | MYPE3510 | - |             | hypothetical protein                                  |
| CDS | MYPE3520 | - |             | conserved hypothetical protein                        |
| CDS | MYPE3530 | O | <i>smpB</i> | tmRNA-binding small protein B                         |
| CDS | MYPE3540 | R |             | hippurate hydrolase                                   |
| CDS | MYPE3550 | R |             | conserved hypothetical protein                        |
| CDS | MYPE3560 | Q |             | ABC transporter ATP-binding protein, MYPE960 paralog  |
| CDS | MYPE3570 | R |             | ABC transporter ATP-binding protein                   |
| CDS | MYPE3580 | - |             | predicted integral membrane protein, paralog family   |
| CDS | MYPE3590 | - |             | hypothetical protein, MYPE3580 paralog                |
| CDS | MYPE3600 | - |             | hypothetical protein, MYPE3580 paralog                |
| CDS | MYPE3610 | - |             | hypothetical protein, MYPE3580 paralog                |
| CDS | MYPE3620 | - |             | conserved hypothetical protein                        |
| CDS | MYPE3630 | R |             | ABC transporter ATP-binding protein, MYPE3080 paralog |
| CDS | MYPE3640 | I | <i>plsX</i> | fatty acid/phospholipid synthesis protein             |
| CDS | MYPE3650 | K | <i>rnc</i>  | ribonuclease III                                      |
| CDS | MYPE3660 | - |             | hypothetical protein                                  |
| CDS | MYPE3670 | K | <i>greA</i> | transcription elongation factor                       |

|     |          |   |              |                                                       |
|-----|----------|---|--------------|-------------------------------------------------------|
| CDS | MYPE3700 | - |              | conserved hypothetical protein                        |
| CDS | MYPE3710 | - | <i>ndhF</i>  | NADH dehydrogenase                                    |
| CDS | MYPE3720 | - |              | hypothetical protein                                  |
| CDS | MYPE3730 | G | <i>tpiA</i>  | triose phosphate isomerase                            |
| CDS | MYPE3740 | G | <i>pgm</i>   | phosphoglycerate mutase                               |
| CDS | MYPE3750 | G | <i>eno</i>   | enolase                                               |
| CDS | MYPE3760 | - |              | hypothetical protein                                  |
| CDS | MYPE3770 | - |              | conserved hypothetical protein                        |
| CDS | MYPE3780 | S |              | conserved hypothetical protein                        |
| CDS | MYPE3790 | O | <i>clpB</i>  | ATP-dependent protease binding subunit                |
| CDS | MYPE3800 | - |              | hypothetical protein                                  |
| CDS | MYPE3810 | - |              | hypothetical protein                                  |
| CDS | MYPE3820 | - |              | hypothetical protein                                  |
| CDS | MYPE3830 | - |              | hypothetical protein                                  |
| CDS | MYPE3840 | - |              | hypothetical protein                                  |
| CDS | MYPE3850 | - |              | hypothetical protein                                  |
| CDS | MYPE3860 | - |              | hypothetical protein                                  |
| CDS | MYPE3870 | F | <i>pyrC</i>  | dihydroorotase                                        |
| CDS | MYPE3880 | J | <i>rpsO</i>  | ribosomal protein S15                                 |
| CDS | MYPE3890 | J | <i>leuS</i>  | leucyl-tRNA synthetase                                |
| CDS | MYPE3900 | J | <i>rpmG</i>  | ribosomal protein L33                                 |
| CDS | MYPE3910 | E | <i>pepP</i>  | aminopeptidase P                                      |
| CDS | MYPE3920 | C | <i>dhaS</i>  | aldehyde dehydrogenase                                |
| CDS | MYPE3930 | R |              | esterase/lipase I                                     |
| CDS | MYPE3940 | - |              | hypothetical protein                                  |
| CDS | MYPE3950 | - |              | hypothetical protein                                  |
| CDS | MYPE3960 | R |              | putative two-component regulator                      |
| CDS | MYPE3970 | S |              | conserved hypothetical protein                        |
| CDS | MYPE3980 | O | <i>tpx</i>   | thiol peroxidase                                      |
| CDS | MYPE3985 | - |              | hypothetical protein                                  |
| CDS | MYPE3990 | - |              | hypothetical protein                                  |
| CDS | MYPE4000 | - |              | hypothetical protein                                  |
| CDS | MYPE4010 | - |              | hypothetical protein                                  |
| CDS | MYPE4020 | S |              | putative integral membrane protein                    |
| CDS | MYPE4030 | J | <i>rpL28</i> | ribosomal protein L28                                 |
| CDS | MYPE4040 | J | <i>asnS</i>  | asparaginyl-tRNA synthetase                           |
| CDS | MYPE4050 | I | <i>pgsA</i>  | phosphatidylglycerophosphate synthase                 |
| CDS | MYPE4060 | J | <i>serS</i>  | seryl-tRNA synthetase                                 |
| CDS | MYPE4070 | - |              | conserved hypothetical protein, MYPE6060 paralog      |
| CDS | MYPE4080 | - |              | hypothetical protein                                  |
| CDS | MYPE4090 | Q |              | ABC transporter ATP-binding protein, MYPE2470 paralog |
| CDS | MYPE4100 | Q |              | ABC transporter ATP-binding protein, MYPE2470 paralog |
| CDS | MYPE4110 | C |              | aldehyde dehydrogenase                                |
| CDS | MYPE4120 | - |              | conserved hypothetical protein                        |
| CDS | MYPE4130 | R |              | predicted dihydroacetone kinase                       |
| CDS | MYPE4140 | L | <i>topA</i>  | DNA topoisomerase I                                   |
| CDS | MYPE4150 | - |              | hypothetical protein                                  |
| CDS | MYPE4160 | I | <i>acp</i>   | acyl carrier protein                                  |
| CDS | MYPE4170 | L |              | predicted endo/excinuclease                           |
| CDS | MYPE4180 | - |              | transposase for IS232-like insertion sequence element |
| CDS | MYPE4190 | L |              | Insertion sequence IS232 putative ATP-binding protein |
| CDS | MYPE4200 | - |              | hypothetical protein                                  |
| CDS | MYPE4210 | - |              | hypothetical protein                                  |
| CDS | MYPE4220 | R |              | conserved hypothetical protein, paralog family        |
| CDS | MYPE4230 | R |              | conserved hypothetical protein, paralog family        |
| CDS | MYPE4240 | - |              | hypothetical protein                                  |



|     |          |   |              |                                                                                                                                                  |
|-----|----------|---|--------------|--------------------------------------------------------------------------------------------------------------------------------------------------|
| CDS | MYPE4250 | - |              | hypothetical protein                                                                                                                             |
| CDS | MYPE4260 | G |              | 6-phosphogluconate dehydrogenase                                                                                                                 |
| CDS | MYPE4270 | - |              | conserved hypothetical protein                                                                                                                   |
| CDS | MYPE4280 | S |              | proline dipeptidase                                                                                                                              |
| CDS | MYPE4290 | F | <i>purB</i>  | adenylosuccinate synthetase                                                                                                                      |
| CDS | MYPE4300 | - |              | hypothetical protein                                                                                                                             |
| CDS | MYPE4310 | J |              | putative integral membrane protein, immuno-dominant variable surface antigen of Entamoeba histolytica CAA38847.1, Expect=3.0e-16, Identities=29% |
| CDS | MYPE4320 | - |              | putative integral membrane protein                                                                                                               |
| CDS | MYPE4330 | - |              | hypothetical protein, paralog family                                                                                                             |
| CDS | MYPE4340 | - |              | hypothetical protein, MYPE4340 paralog                                                                                                           |
| CDS | MYPE4350 | - |              | hypothetical protein, MYPE4340 paralog                                                                                                           |
| CDS | MYPE4360 | - |              | hypothetical protein, MYPE4340 paralog                                                                                                           |
| CDS | MYPE4370 | - |              | hypothetical protein                                                                                                                             |
| CDS | MYPE4380 | - | <i>mmuA</i>  | membrane nuclease                                                                                                                                |
| CDS | MYPE4390 | - |              | hypothetical protein                                                                                                                             |
| CDS | MYPE4400 | C | <i>ppa</i>   | inorganic pyrophosphatase                                                                                                                        |
| CDS | MYPE4410 | - |              | putative integral membrane protein                                                                                                               |
| CDS | MYPE4420 | J | <i>rpL21</i> | ribosomal protein L21                                                                                                                            |
| CDS | MYPE4430 | J |              | conserved hypothetical protein                                                                                                                   |
| CDS | MYPE4440 | J | <i>rpmA</i>  | ribosomal protein L27                                                                                                                            |
| CDS | MYPE4450 | - |              | hypothetical protein                                                                                                                             |
| CDS | MYPE4460 | G | <i>ppe</i>   | d-ribulose-5-phosphate 3 epimerase                                                                                                               |
| CDS | MYPE4470 | L |              | transcriptional antiterminator BglG family                                                                                                       |
| CDS | MYPE4480 | G |              | PTS system enzyme IIA component                                                                                                                  |
| CDS | MYPE4490 | G |              | conserved hypothetical protein                                                                                                                   |
| CDS | MYPE4500 | S |              | PTS system enzyme IIC component                                                                                                                  |
| CDS | MYPE4510 | G | <i>tktA</i>  | transketolase I                                                                                                                                  |
| CDS | MYPE4520 | - |              | HAD superfamily hydrolase                                                                                                                        |
| CDS | MYPE4530 | - |              | hypothetical protein                                                                                                                             |
| CDS | MYPE4540 | G |              | PTS system enzyme IIBC components                                                                                                                |
| CDS | MYPE4550 | G | <i>bglH</i>  | beta glucosidase                                                                                                                                 |
| CDS | MYPE4560 | G | <i>bglH</i>  | beta glucosidase                                                                                                                                 |
| CDS | MYPE4570 | R |              | conserved hypothetical protein                                                                                                                   |
| CDS | MYPE4580 | J | <i>trpS</i>  | tryptophanyl-tRNA synthetase                                                                                                                     |
| CDS | MYPE4590 | P |              | conserved hypothetical protein                                                                                                                   |
| CDS | MYPE4600 | R |              | conserved hypothetical protein                                                                                                                   |
| CDS | MYPE4610 | G |              | conserved hypothetical protein                                                                                                                   |
| CDS | MYPE4620 | E | <i>gbsB</i>  | alcohol dehydrogenase                                                                                                                            |
| CDS | MYPE4630 | - |              | hypothetical protein, paralog family                                                                                                             |
| CDS | MYPE4640 | - |              | hypothetical protein                                                                                                                             |
| CDS | MYPE4650 | - |              | hypothetical protein, MYPE4630 paralog                                                                                                           |
| CDS | MYPE4660 | - |              | hypothetical protein, MYPE4630 paralog                                                                                                           |
| CDS | MYPE4680 | - |              | hypothetical protein, MYPE4630 paralog                                                                                                           |
| CDS | MYPE4690 | G | <i>pgi</i>   | glucose-6-phosphate isomerase                                                                                                                    |
| CDS | MYPE4700 | - |              | conserved hypothetical protein                                                                                                                   |
| CDS | MYPE4710 | C | <i>gap</i>   | NADP-dependent glyceraldehyde-3-phosphate dehydrogenase                                                                                          |
| CDS | MYPE4720 | R |              | oxidoreductase-aldo/keto reductase family, paralog family                                                                                        |
| CDS | MYPE4730 | - |              | hypothetical protein, similar to CagA protein of Helicobacter pylori AJ269854, Expect=2.4e-01, Identities=40%                                    |
| CDS | MYPE4740 | - |              | hypothetical protein, MYPE 5680paralog                                                                                                           |
| CDS | MYPE4750 | - |              | hypothetical protein, MYPE 5680paralog                                                                                                           |
| CDS | MYPE4760 | - |              | hypothetical protein, MYPE 5680paralog                                                                                                           |
| CDS | MYPE4765 | - |              | hypothetical protein                                                                                                                             |
| CDS | MYPE4770 | L |              | conserved hypothetical protein                                                                                                                   |

|     |          |   |             |                                                                                                                             |
|-----|----------|---|-------------|-----------------------------------------------------------------------------------------------------------------------------|
| CDS | MYPE4780 | L |             | N-4 cytosine-specific and N-6 adenine-specific DNA methylases                                                               |
| CDS | MYPE4790 | L |             | hypothetical ATP/GTP-binding protein                                                                                        |
| CDS | MYPE4800 | - |             | hypothetical ATP/GTP-binding protein                                                                                        |
| CDS | MYPE4810 | R |             | oxidoreductase, MYPE4720 paralog                                                                                            |
| CDS | MYPE4820 | - |             | hypothetical protein                                                                                                        |
| CDS | MYPE4830 | D |             | structural maintenance of chromosomes SMC superfamily proteins                                                              |
| CDS | MYPE4840 | N | <i>ftsY</i> | signal recognition particle SRP- homologue of FtsY                                                                          |
| CDS | MYPE4850 | S |             | conserved hypothetical protein                                                                                              |
| CDS | MYPE4860 | - |             | hypothetical protein                                                                                                        |
| CDS | MYPE4870 | - |             | hypothetical protein                                                                                                        |
| CDS | MYPE4880 | L |             | transposase for IS1630-like insertion sequence element                                                                      |
| CDS | MYPE4890 | - |             | hypothetical protein                                                                                                        |
| CDS | MYPE4900 | D |             | hypothetical protein                                                                                                        |
| CDS | MYPE4910 | - |             | hypothetical protein                                                                                                        |
| CDS | MYPE4920 | S |             | conserved hypothetical protein                                                                                              |
| CDS | MYPE4930 | - |             | conserved hypothetical protein                                                                                              |
| CDS | MYPE4940 | L |             | cytosine-specific DNA methyltransferase                                                                                     |
| CDS | MYPE4950 | R |             | haloacid dehalogenase-like hydrolase                                                                                        |
| CDS | MYPE4960 | F | <i>nrdD</i> | anaerobic ribonucleoside-triphosphate reductase                                                                             |
| CDS | MYPE4970 | O | <i>nrdG</i> | anaerobic ribonucleoside-triphosphate reductase activating protein                                                          |
| CDS | MYPE4980 | - |             | conserved hypothetical protein, similar to HMW1 of <i>Mycoplasma pneumoniae</i> , Pfam ELK domain Accession number: PF03789 |
| CDS | MYPE4990 | - |             | hypothetical protein, paralog family                                                                                        |
| CDS | MYPE5000 | - |             | hypothetical protein, MYPE 4990 paralog                                                                                     |
| CDS | MYPE5010 | H | <i>hemN</i> | oxygen-independent coproporphyrinogen III oxidase                                                                           |
| CDS | MYPE5020 | J | <i>miaA</i> | tRNA-isopentenyl pyrophosphate transferase                                                                                  |
| CDS | MYPE5030 | C | <i>pta</i>  | phosphotransacetylase                                                                                                       |
| CDS | MYPE5040 | - |             | hypothetical protein                                                                                                        |
| CDS | MYPE5050 | - |             | putative transcription antiterminator BglG family                                                                           |
| CDS | MYPE5060 | - |             | hypothetical protein                                                                                                        |
| CDS | MYPE5070 | D |             | conserved hypothetical protein                                                                                              |
| CDS | MYPE5080 | C | <i>pdhA</i> | pyruvate dehydrogenase E1 component subunit alpha                                                                           |
| CDS | MYPE5090 | C | <i>pdhB</i> | pyruvate dehydrogenase E1 component subunit beta                                                                            |
| CDS | MYPE5100 | C | <i>pdhC</i> | dihydrolipoamide acetyltransferase of pyruvate dehydrogenase E2 component                                                   |
| CDS | MYPE5110 | C | <i>pdhD</i> | dihydrolipoamide dehydrogenase of pyruvate dehydrogenase E3 component                                                       |
| CDS | MYPE5120 | O |             | glutathione peroxidase                                                                                                      |
| CDS | MYPE5130 | C |             | putative oxidoreductase                                                                                                     |
| CDS | MYPE5140 | K |             | transcriptional regulator AcrR family                                                                                       |
| CDS | MYPE5150 | - |             | conserved hypothetical protein                                                                                              |
| CDS | MYPE5160 | - |             | conserved hypothetical protein                                                                                              |
| CDS | MYPE5170 | E | <i>aapA</i> | amino acid permease                                                                                                         |
| CDS | MYPE5180 | S |             | conserved hypothetical protein                                                                                              |
| CDS | MYPE5190 | R |             | putative haloacid dehalogenase-like hydrolase                                                                               |
| CDS | MYPE5200 | H |             | putative nucleotidyl transferase                                                                                            |
| CDS | MYPE5210 | F | <i>pfs</i>  | 5'-Methylthioadenosine/S-adenosylhomocysteine nucleosidase                                                                  |
| CDS | MYPE5220 | R |             | conserved hypothetical protein                                                                                              |
| CDS | MYPE5230 | R | <i>adhA</i> | NADP-dependent alcohol dehydrogenase                                                                                        |
| CDS | MYPE5240 | F |             | putative xanthosine triphosphate pyrophosphatase HAM1 family                                                                |

|     |          |   |             |                                                           |
|-----|----------|---|-------------|-----------------------------------------------------------|
| CDS | MYPE5250 | - |             | hypothetical protein                                      |
| CDS | MYPE5260 | R |             | conserved hypothetical protein, MYPE4230 paralog          |
| CDS | MYPE5270 | - |             | conserved hypothetical protein                            |
| CDS | MYPE5280 | S | <i>spot</i> | ppGpp 3'-pyrophosphohydrolase                             |
| CDS | MYPE5290 | R |             | conserved hypothetical protein                            |
| CDS | MYPE5300 | - |             | hypothetical protein, paralog family                      |
| CDS | MYPE5310 | - |             | hypothetical protein                                      |
| CDS | MYPE5330 | - |             | hypothetical protein                                      |
| CDS | MYPE5340 | - |             | hypothetical protein                                      |
| CDS | MYPE5350 | L |             | transposase for IS1630-like insertion sequence element    |
| CDS | MYPE5360 | - |             | hypothetical protein                                      |
| CDS | MYPE5370 | - |             | hypothetical protein                                      |
| CDS | MYPE5380 | - |             | hypothetical protein                                      |
| CDS | MYPE5390 | - |             | hypothetical protein, MYPE5300 paralog                    |
| CDS | MYPE5400 | L |             | transposase for IS1630-like insertion sequence element    |
| CDS | MYPE5410 | - |             | transposase for IS1202-like insertion sequence element    |
| CDS | MYPE5420 | - |             | hypothetical protein                                      |
| CDS | MYPE5430 | - |             | hypothetical protein, MYPE5300 paralog                    |
| CDS | MYPE5440 | R |             | predicted HD superfamily hydrolase                        |
| CDS | MYPE5445 | - |             | hypothetical protein                                      |
| CDS | MYPE5450 | G | <i>ptsI</i> | PTS system enzyme I                                       |
| CDS | MYPE5460 | R |             | lipase-esterase related protein                           |
| CDS | MYPE5470 | N | <i>secA</i> | preprotein translocase SecA                               |
| CDS | MYPE5480 | - |             | hypothetical protein                                      |
| CDS | MYPE5490 | - |             | transposase for IS232-like insertion sequence element     |
| CDS | MYPE5500 | L |             | IS232 putative ATP-binding protein IstB                   |
| CDS | MYPE5505 | - |             | hypothetical protein                                      |
| CDS | MYPE5510 | - |             | hypothetical protein                                      |
| CDS | MYPE5520 | R | <i>oppF</i> | oligopeptide transport ATP-binding protein OppF           |
| CDS | MYPE5530 | R | <i>oppD</i> | oligopeptide transport ATP-binding protein OppD           |
| CDS | MYPE5540 | E | <i>oppC</i> | oligopeptide transport system permease protein OppC       |
| CDS | MYPE5550 | E | <i>oppB</i> | oligopeptide transport system permease protein OppB       |
| CDS | MYPE5560 | - |             | conserved hypothetical protein                            |
| CDS | MYPE5570 | R |             | glutamine transport ATP-binding protein, MYPE3080 paralog |
| CDS | MYPE5580 | - |             | conserved hypothetical protein                            |
| CDS | MYPE5590 | - |             | conserved hypothetical protein                            |
| CDS | MYPE5600 | - |             | predicted methylase                                       |
| CDS | MYPE5610 | O | <i>pmsR</i> | peptide methionine sulfoxide reductase                    |
| CDS | MYPE5620 | T |             | protein phosphatase                                       |
| CDS | MYPE5630 | R |             | ortholog of YloN of Bacillus subtilis                     |
| CDS | MYPE5640 | F | <i>gmk</i>  | guanylate kinase                                          |
| CDS | MYPE5650 | J | <i>def</i>  | polypeptide deformylase                                   |
| CDS | MYPE5660 | L |             | transposase for IS1630-like insertion sequence element    |
| CDS | MYPE5670 | - |             | hypothetical protein, MYPE5680 paralog                    |
| CDS | MYPE5680 | - |             | hypothetical protein, paralog family                      |
| CDS | MYPE5690 | - |             | hypothetical protein                                      |
| CDS | MYPE5700 | C | <i>ackA</i> | acetate kinase                                            |
| CDS | MYPE5710 | - |             | transposase for IS1202-like insertion sequence element    |
| CDS | MYPE5720 | L |             | transposase for IS1202-like insertion sequence element    |
| CDS | MYPE5730 | J | <i>rplL</i> | ribosomal protein L7/L12                                  |
| CDS | MYPE5740 | J | <i>rplJ</i> | ribosomal protein L10                                     |
| CDS | MYPE5750 | C | <i>glpQ</i> | glycerophosphoryl diester phosphodiesterase               |
| CDS | MYPE5760 | G |             | permease                                                  |
| CDS | MYPE5770 | - |             | hypothetical protein                                      |

|     |          |   |             |                                                                                                                                                        |
|-----|----------|---|-------------|--------------------------------------------------------------------------------------------------------------------------------------------------------|
| CDS | MYPE5780 | - |             | hypothetical protein                                                                                                                                   |
| CDS | MYPE5790 | - |             | hypothetical protein                                                                                                                                   |
| CDS | MYPE5800 | R |             | predicted AAA family ATPase                                                                                                                            |
| CDS | MYPE5810 | F | <i>htp</i>  | hypoxanthine-guanine phosphoribosyltransferase                                                                                                         |
| CDS | MYPE5820 | F |             | adenylosuccinate lyase                                                                                                                                 |
| CDS | MYPE5830 | F |             | adenylosuccinate synthetase                                                                                                                            |
| CDS | MYPE5840 | - |             | hypothetical protein                                                                                                                                   |
| CDS | MYPE5850 | R |             | predicted phosphoesterase                                                                                                                              |
| CDS | MYPE5860 | H | <i>thil</i> | thiamin biosynthesis protein                                                                                                                           |
| CDS | MYPE5870 | R |             | sugar ABC transporter permease                                                                                                                         |
| CDS | MYPE5880 | R |             | sugar ABC transporter permease                                                                                                                         |
| CDS | MYPE5890 | G |             | sugar ABC transporter ATP-binding protein                                                                                                              |
| CDS | MYPE5900 | N |             | putative lipoprotein                                                                                                                                   |
| CDS | MYPE5910 | G |             | PTS system enzyme IIABC component                                                                                                                      |
| CDS | MYPE5920 | G | <i>pfk</i>  | 6-phosphofructokinase                                                                                                                                  |
| CDS | MYPE5930 | - |             | hypothetical protein                                                                                                                                   |
| CDS | MYPE5940 | K |             | MerR subfamily transcriptional regulator                                                                                                               |
| CDS | MYPE5950 | - |             | conserved hypothetical protein, MYPE5960 paralog                                                                                                       |
| CDS | MYPE5960 | R |             | conserved hypothetical protein, paralog family                                                                                                         |
| CDS | MYPE5970 | R |             | hypothetical protein                                                                                                                                   |
| CDS | MYPE5980 | - |             | conserved hypothetical protein, MYPE5960 paralog                                                                                                       |
| CDS | MYPE5990 | - |             | predicted lipase                                                                                                                                       |
| CDS | MYPE6000 | - |             | hypothetical protein                                                                                                                                   |
| CDS | MYPE6010 | - |             | predicted lipase                                                                                                                                       |
| CDS | MYPE6020 | - |             | hypothetical protein                                                                                                                                   |
| CDS | MYPE6030 | - |             | predicted lipase                                                                                                                                       |
| CDS | MYPE6040 | - |             | hypothetical protein                                                                                                                                   |
| CDS | MYPE6050 | - |             | predicted integral membrane protein                                                                                                                    |
| CDS | MYPE6060 | - |             | predicted integral membrane protein, paralog family, low similarity to 116 kDa surface antigen of Mycoplasma genitalium Expect=1.4e-09, Identities=22% |
| CDS | MYPE6070 | - |             | hypothetical protein, MYPE6060 paralog                                                                                                                 |
| CDS | MYPE6080 | E | <i>arcA</i> | arginine deiminase                                                                                                                                     |
| CDS | MYPE6090 | E | <i>arcB</i> | ornithine carbamoyltransferase                                                                                                                         |
| CDS | MYPE6100 | E | <i>arcC</i> | carbamate kinase                                                                                                                                       |
| CDS | MYPE6110 | E |             | amino acid permeases                                                                                                                                   |
| CDS | MYPE6120 | J | <i>argS</i> | arginyl tRNA synthetase                                                                                                                                |
| CDS | MYPE6130 | R |             | predicted permease, MYPE890 paralog                                                                                                                    |
| CDS | MYPE6140 | - |             | hypothetical protein                                                                                                                                   |
| CDS | MYPE6155 | - |             | hypothetical protein                                                                                                                                   |
| CDS | MYPE6160 | - |             | hypothetical protein                                                                                                                                   |
| CDS | MYPE6175 | - |             | hypothetical protein                                                                                                                                   |
| CDS | MYPE6180 | - |             | conserved hypothetical protein                                                                                                                         |
| CDS | MYPE6190 | - |             | conserved hypothetical protein                                                                                                                         |
| CDS | MYPE6200 | - |             | hypothetical protein, MYPE6410 paralog                                                                                                                 |
| CDS | MYPE6210 | C |             | NADH-dependent butanol dehydrogenase                                                                                                                   |
| CDS | MYPE6220 | - |             | hypothetical protein                                                                                                                                   |
| CDS | MYPE6230 | - |             | hypothetical protein                                                                                                                                   |
| CDS | MYPE6240 | Q | <i>aldB</i> | alpha-acetolactate decarboxylase                                                                                                                       |
| CDS | MYPE6250 | Q |             | probable 3-ketoacyl-acyl carrier protein reductase                                                                                                     |
| CDS | MYPE6260 | P |             | formate/ nitrite transporter                                                                                                                           |
| CDS | MYPE6270 | S |             | conserved hypothetical protein                                                                                                                         |
| CDS | MYPE6275 | - |             | conserved hypothetical protein                                                                                                                         |
| CDS | MYPE6280 | - |             | conserved hypothetical protein                                                                                                                         |
| CDS | MYPE6290 | - |             | transposase for IS232-like insertion sequence element                                                                                                  |
| CDS | MYPE6300 | L |             | IS232 putative ATP-binding protein IstB                                                                                                                |

|     |          |   |             |                                                                                                                                 |
|-----|----------|---|-------------|---------------------------------------------------------------------------------------------------------------------------------|
| CDS | MYPE6310 | - |             | conserved hypothetical protein                                                                                                  |
| CDS | MYPE6320 | - |             | conserved hypothetical protein                                                                                                  |
| CDS | MYPE6330 | - |             | conserved hypothetical protein                                                                                                  |
| CDS | MYPE6340 | M |             | putative glycosyl transferase                                                                                                   |
| CDS | MYPE6360 | C | <i>glpK</i> | glycerol kinase                                                                                                                 |
| CDS | MYPE6370 | R | <i>glpA</i> | glycerol-3-phosphate dehydrogenase                                                                                              |
| CDS | MYPE6380 | G | <i>glpF</i> | glycerol uptake facilitator protein                                                                                             |
| CDS | MYPE6390 | L | <i>recA</i> | recombination protein RecA                                                                                                      |
| CDS | MYPE6400 | R | <i>cinA</i> | putative competence-damage inducible protein CinA                                                                               |
| CDS | MYPE6410 | - |             | hypothetical protein                                                                                                            |
| CDS | MYPE6420 | R |             | NADPH oxidoreductase                                                                                                            |
| CDS | MYPE6430 | C |             | NADPH flavin oxidoreductase                                                                                                     |
| CDS | MYPE6440 | R |             | conserved hypothetical ATP/GTP-binding protein                                                                                  |
| CDS | MYPE6450 | R |             | conserved hypothetical protein                                                                                                  |
| CDS | MYPE6460 | J |             | conserved hypothetical proteins                                                                                                 |
| CDS | MYPE6470 | L | <i>parC</i> | DNA topoisomerase IV subunit A                                                                                                  |
| CDS | MYPE6480 | L | <i>parE</i> | DNA topoisomerase IV subunit B                                                                                                  |
| CDS | MYPE6490 | - |             | P35 lipoprotein homologue                                                                                                       |
| CDS | MYPE6495 | - |             | P35 lipoprotein homologue fragment, MYPE6495 and MYPE6500 are predicted as the same gene with a frameshift                      |
| CDS | MYPE6500 | - |             | P35 lipoprotein homologue fragment, MYPE6495 and MYPE6500 are predicted as the same gene with a frameshift                      |
| CDS | MYPE6510 | - |             | P35 lipoprotein homologue                                                                                                       |
| CDS | MYPE6520 | - |             | P33 lipoprotein homologue fragment, MYPE6520 and MYPE6525 are predicted as the same gene with a frameshift                      |
| CDS | MYPE6525 | - |             | P33 lipoprotein homologue fragment, MYPE6520 and MYPE6525 are predicted as the same gene with a frameshift                      |
| CDS | MYPE6530 | - |             | P35 lipoprotein homologue                                                                                                       |
| CDS | MYPE6540 | - |             | P35 lipoprotein homologue                                                                                                       |
| CDS | MYPE6550 | - |             | P35 lipoprotein homologue                                                                                                       |
| CDS | MYPE6560 | - |             | P35 lipoprotein homologue                                                                                                       |
| CDS | MYPE6570 | - |             | P35 lipoprotein homologue                                                                                                       |
| CDS | MYPE6580 | - |             | P35 lipoprotein homologue                                                                                                       |
| CDS | MYPE6590 | - |             | P35 lipoprotein homologue                                                                                                       |
| CDS | MYPE6600 | P |             | transport system permease, similar to P69 of <i>Mycoplasma hyorhinis</i> Expect=3.3e-80, Identities=33%                         |
| CDS | MYPE6610 | P |             | ABC transporter ATP-binding protein, MYPE3080 paralog                                                                           |
| CDS | MYPE6620 | - |             | high affinity transport system protein, similar to P37 of <i>Mycoplasma hyorhinis</i> Expect=4.3e-54, Identities=35%            |
| CDS | MYPE6630 | - |             | P35 lipoprotein homologue reported as putative lipoprotein IMP13                                                                |
| CDS | MYPE6640 | - |             | P35 lipoprotein homologue                                                                                                       |
| CDS | MYPE6650 | - |             | P35 lipoprotein homologue                                                                                                       |
| CDS | MYPE6660 | - |             | P35 lipoprotein homologue                                                                                                       |
| CDS | MYPE6670 | - |             | P35 lipoprotein homologue                                                                                                       |
| CDS | MYPE6680 | - |             | P35 lipoprotein homologue                                                                                                       |
| CDS | MYPE6690 | - |             | P35 lipoprotein homologue                                                                                                       |
| CDS | MYPE6700 | - |             | hypothetical protein                                                                                                            |
| CDS | MYPE6710 | - |             | P35 lipoprotein homologue                                                                                                       |
| CDS | MYPE6720 | - |             | P35 lipoprotein homologue                                                                                                       |
| CDS | MYPE6730 | - |             | P35 lipoprotein homologue                                                                                                       |
| CDS | MYPE6740 | - |             | P35 lipoprotein homologue                                                                                                       |
| CDS | MYPE6750 | - |             | P35 lipoprotein homologue                                                                                                       |
| CDS | MYPE6760 | - |             | conserved hypothetical protein                                                                                                  |
| CDS | MYPE6770 | - |             | conserved hypothetical protein, similar to exported protein of <i>Yersinia pestis</i> AJ414151, Expect=1.3e-20, Identities =38% |

|     |          |   |             |                                                                                                                       |
|-----|----------|---|-------------|-----------------------------------------------------------------------------------------------------------------------|
| CDS | MYPE6780 | - |             | P35 lipoprotein homologue reported as gene for P38 lipoprotein                                                        |
| CDS | MYPE6790 | - |             | P35 lipoprotein homologue                                                                                             |
| CDS | MYPE6800 | - |             | P35 lipoprotein homologue reported as gene for P33 lipoprotein                                                        |
| CDS | MYPE6810 | - |             | P35 lipoprotein                                                                                                       |
| CDS | MYPE6820 | - |             | P35 lipoprotein homologue reported as IMP14                                                                           |
| CDS | MYPE6830 | - |             | P35 lipoprotein homologue                                                                                             |
| CDS | MYPE6840 | - |             | P35 lipoprotein homologue                                                                                             |
| CDS | MYPE6850 | - |             | putative lipoprotein, paralog family                                                                                  |
| CDS | MYPE6860 | H | <i>dhfR</i> | dihydrofolate reductase                                                                                               |
| CDS | MYPE6870 | F | <i>thyA</i> | thymidylate synthase                                                                                                  |
| CDS | MYPE6880 | H | <i>folD</i> | methylenetetrahydrofolate dehydrogenase(NADP+)/methenyltetrahydrofolate cyclohydrolase                                |
| CDS | MYPE6890 | E |             | pyruvate decarboxylase                                                                                                |
| CDS | MYPE6900 | C | <i>bdhA</i> | butanol dehydrogenase                                                                                                 |
| CDS | MYPE6910 | O | <i>lon</i>  | ATP-dependent protease La                                                                                             |
| CDS | MYPE6920 | O | <i>tig</i>  | trigger factor, FKBP-type peptidyl-prolyl cis-transisomerase                                                          |
| CDS | MYPE6930 | E | <i>aapA</i> | amino acid permease                                                                                                   |
| CDS | MYPE6940 | - |             | conserved hypothetical protein, predicted integrated membrane protein                                                 |
| CDS | MYPE6950 | - |             | conserved hypothetical protein, MYPE6970 paralog, similar to putative lipoprotein of Mycoplasma genitalium U39711     |
| CDS | MYPE6960 | - |             | conserved hypothetical protein, MYPE6970 paralog, similar to putative lipoprotein of Mycoplasma genitalium U39711     |
| CDS | MYPE6970 | - |             | conserved hypothetical protein, paralog family, similar to putative lipoprotein of Mycoplasma genitalium U39711       |
| CDS | MYPE6980 | - |             | conserved hypothetical protein, MYPE6970 paralog, similar to putative lipoprotein of Mycoplasma genitalium U39711     |
| CDS | MYPE6990 | - |             | conserved hypothetical protein, MYPE6970 paralog, similar to putative lipoprotein of Mycoplasma genitalium U39711     |
| CDS | MYPE7000 | - |             | conserved hypothetical protein, MYPE6970 paralog truncated                                                            |
| CDS | MYPE7010 | - |             | conserved hypothetical protein, MYPE6970 paralog, similar to putative lipoprotein of Mycoplasma genitalium U39711     |
| CDS | MYPE7020 | - |             | signal-peptide-less P35 lipoprotein homologue                                                                         |
| CDS | MYPE7030 | - |             | signal-peptide-less P35 lipoprotein homologue, MYPE7030 and MYPE7035 are predicted as the same gene with a frameshift |
| CDS | MYPE7035 | - |             | signal-peptide-less P35 lipoprotein homologue, MYPE7030 and MYPE7035 are predicted as the same gene with a frameshift |
| CDS | MYPE7040 | - |             | signal-peptide-less P35 lipoprotein homologue                                                                         |
| CDS | MYPE7050 | - |             | signal-peptide-less P35 lipoprotein homologue                                                                         |
| CDS | MYPE7060 | - |             | signal-peptide-less P35 lipoprotein homologue                                                                         |
| CDS | MYPE7070 | - |             | signal-peptide-less P35 lipoprotein homologue                                                                         |
| CDS | MYPE7080 | - |             | hypothetical protein                                                                                                  |
| CDS | MYPE7090 | - |             | hypothetical protein                                                                                                  |
| CDS | MYPE7100 | L |             | transposase for IS150-like insertion sequence element                                                                 |
| CDS | MYPE7110 | - |             | hypothetical protein, MYPE6850 paralog                                                                                |
| CDS | MYPE7115 | - |             | hypothetical protein                                                                                                  |
| CDS | MYPE7120 | - |             | transposase for IS232-like insertion sequence element                                                                 |
| CDS | MYPE7130 | L |             | Insertion sequence IS232 putative ATP-binding protein                                                                 |
| CDS | MYPE7140 | - |             | hypothetical protein, MYPE6850 paralog                                                                                |
| CDS | MYPE7150 | - |             | conserved hypothetical protein                                                                                        |
| CDS | MYPE7160 | G | <i>sgaE</i> | L-ribulose-5-phosphate 4-epimerase family protein                                                                     |

|     |          |   |             |                                                                                                                                                       |
|-----|----------|---|-------------|-------------------------------------------------------------------------------------------------------------------------------------------------------|
| CDS | MYPE7170 | G | <i>sgaU</i> | hexulose-6-phosphate isomerase                                                                                                                        |
| CDS | MYPE7180 | G | <i>sgaH</i> | hexulose-6-phosphate synthase                                                                                                                         |
| CDS | MYPE7190 | - |             | PTS system enzyme IIA component                                                                                                                       |
| CDS | MYPE7200 | G | <i>sgaB</i> | PTS system enzyme IIB component                                                                                                                       |
| CDS | MYPE7210 | - |             | similar to transport protein SgaT                                                                                                                     |
| CDS | MYPE7220 | S | <i>sgaT</i> | transport protein SgaT                                                                                                                                |
| CDS | MYPE7230 | - |             | hypothetical protein                                                                                                                                  |
| CDS | MYPE7240 | R |             | phosphotriesterase family protein                                                                                                                     |
| CDS | MYPE7250 | - |             | conserved hypothetical protein                                                                                                                        |
| CDS | MYPE7260 | - |             | hypothetical protein                                                                                                                                  |
| CDS | MYPE7270 | R |             | conserved hypothetical protein, predicted integral membrane protein                                                                                   |
| CDS | MYPE7280 | Q |             | ABC transporter ATP-binding protein, MYPE960 paralog                                                                                                  |
| CDS | MYPE7290 | - |             | hypothetical protein                                                                                                                                  |
| CDS | MYPE7300 | - |             | conserved hypothetical protein, MYPE2560 paralog                                                                                                      |
| CDS | MYPE7310 | R |             | conserved hypothetical, similar to OrfE1 of Mycoplasma fermentans AF179376 Expect=4.6e-52, Identities=33%                                             |
| CDS | MYPE7320 | - |             | conserved hypothetical protein, MYPE2560 paralog                                                                                                      |
| CDS | MYPE7330 | - |             | P35 lipoprotein homologue                                                                                                                             |
| CDS | MYPE7340 | - |             | conserved hypothetical protein                                                                                                                        |
| CDS | MYPE7350 | - |             | conserved hypothetical protein, MYPE8480 paralog                                                                                                      |
| CDS | MYPE7360 | - |             | conserved hypothetical protein, MYPE8480 paralog                                                                                                      |
| CDS | MYPE7370 | - |             | P35 lipoprotein homologue                                                                                                                             |
| CDS | MYPE7375 | - |             | P35 lipoprotein homologue fragment, MYPE7375 and MYPE7380 are predicted as the same gene with a frameshift                                            |
| CDS | MYPE7380 | - |             | P35 lipoprotein homologue fragment, MYPE7375 and MYPE7380 are predicted as the same gene with a frameshift                                            |
| CDS | MYPE7400 | - |             | P35 lipoprotein homologue                                                                                                                             |
| CDS | MYPE7410 | R |             | conserved hypothetical protein                                                                                                                        |
| CDS | MYPE7420 | C | <i>nifU</i> | nitrogen fixation protein NifU                                                                                                                        |
| CDS | MYPE7430 | E | <i>nifS</i> | nitrogen fixation protein NifS, aminotransferase class-V                                                                                              |
| CDS | MYPE7440 | R |             | conserved hypothetical protein                                                                                                                        |
| CDS | MYPE7450 | R |             | ABC transporter ATP-binding protein                                                                                                                   |
| CDS | MYPE7460 | - |             | predicted acetyltransferase (GNAT) family protein                                                                                                     |
| CDS | MYPE7470 | Q |             | ABC transporter ATP-binding protein                                                                                                                   |
| CDS | MYPE7480 | - |             | conserved hypothetical protein, MYPE7490 paralog                                                                                                      |
| CDS | MYPE7490 | - |             | conserved hypothetical protein, paralog family                                                                                                        |
| CDS | MYPE7500 | - |             | conserved hypothetical protein, MYPE7490 paralog                                                                                                      |
| CDS | MYPE7510 | - |             | conserved hypothetical protein, MYPE7490 paralog                                                                                                      |
| CDS | MYPE7520 | - |             | conserved hypothetical protein, MYPE7490 paralog                                                                                                      |
| CDS | MYPE7530 | Q |             | ABC transporter ATP-binding protein, MYPE2470 paralog                                                                                                 |
| CDS | MYPE7540 | Q |             | ABC transporter ATP-binding protein, MYPE2470 paralog                                                                                                 |
| CDS | MYPE7550 | J | <i>rpsD</i> | ribosomal protein S4                                                                                                                                  |
| CDS | MYPE7560 | - |             | conserved hypothetical protein                                                                                                                        |
| CDS | MYPE7570 | - |             | putative lipoprotein, partial sequence of MYPE7590 paralog, similar to lipoprotein of Mycoplasma genitalium U39713 Expect = 7.5e-91, Identities = 32% |
| CDS | MYPE7580 | - |             | putative lipoprotein                                                                                                                                  |
| CDS | MYPE7590 | - |             | putative lipoprotein, paralog family, similar to lipoprotein of Mycoplasma genitalium U39713                                                          |
| CDS | MYPE7600 | - |             | putative lipoprotein, MYPE7590 paralog, similar to lipoprotein of Mycoplasma genitalium U39713                                                        |
| CDS | MYPE7610 | - |             | putative lipoprotein, MYPE7590 paralog, similar to lipoprotein of Mycoplasma genitalium U39713                                                        |
| CDS | MYPE7620 | - |             | putative lipoprotein, MYPE7590 paralog, similar to                                                                                                    |

|     |          |   |               |                                                                                                |
|-----|----------|---|---------------|------------------------------------------------------------------------------------------------|
|     |          |   |               | lipoprotein of Mycoplasma genitalium U39713                                                    |
| CDS | MYPE7630 | - |               | hypothetical protein                                                                           |
| CDS | MYPE7640 | - |               | hypothetical protein                                                                           |
| CDS | MYPE7650 | R |               | conserved hypothetical protein, MYPE5960 paralog, Pfam domain DUF234 archaeobacterial proteins |
| CDS | MYPE7660 | - |               | conserved hypothetical protein, MYPE7720 paralog                                               |
| CDS | MYPE7670 | G | <i>fruA</i>   | PTS system fructose-specific enzyme IIABC component                                            |
| CDS | MYPE7680 | - |               | hypothetical protein                                                                           |
| CDS | MYPE7690 | - |               | conserved hypothetical protein, putative regulatory protein                                    |
| CDS | MYPE7700 | G | <i>pmi</i>    | mannose-6-phosphate isomerase                                                                  |
| CDS | MYPE7710 | - |               | conserved hypothetical protein, MYPE7720 paralog                                               |
| CDS | MYPE7720 | - |               | conserved hypothetical protein, paralog family, predicted integral membrane protein            |
| CDS | MYPE7730 | - |               | conserved hypothetical protein, MYPE7720 paralog                                               |
| CDS | MYPE7750 | G | <i>fruK</i>   | 1-phosphofructokinase                                                                          |
| CDS | MYPE7760 | G | <i>fruA</i>   | PTS system fructose-specific IIABC component                                                   |
| CDS | MYPE7770 | - |               | transcriptional regulator DeoR family protein                                                  |
| CDS | MYPE7780 | - |               | transposase for IS1202-like insert sequence element                                            |
| CDS | MYPE7790 | - |               | conserved hypothetical protein, MYPE7800 paralog                                               |
| CDS | MYPE7800 | - |               | conserved hypothetical protein, predicted integral membrane protein, paralog family            |
| CDS | MYPE7810 | - |               | conserved hypothetical protein, MYPE7800 paralog                                               |
| CDS | MYPE7820 | - |               | hypothetical protein                                                                           |
| CDS | MYPE7830 | R |               | conserved hypothetical protein, predicted ATPase, MYPE4220 paralog                             |
| CDS | MYPE7840 | F | <i>pyrE</i>   | orotate phosphoribosyltransferase                                                              |
| CDS | MYPE7850 | F | <i>pyrF</i>   | orotidine-5-phosphate decarboxylase                                                            |
| CDS | MYPE7860 | F | <i>pyrD</i>   | dihydroorotate dehydrogenase                                                                   |
| CDS | MYPE7870 | C | <i>pyrDII</i> | dihydroorotate dehydrogenase electron transfer subunit                                         |
| CDS | MYPE7880 | F | <i>pyrC</i>   | dihydroorotase                                                                                 |
| CDS | MYPE7890 | F | <i>pyrB</i>   | aspartate carbamoyltransferase                                                                 |
| CDS | MYPE7900 | F | <i>pyrR</i>   | pyrimidine operon repressor                                                                    |
| CDS | MYPE7910 | - |               | hypothetical protein, paralog family, predicted integral membrane protein                      |
| CDS | MYPE7920 | - |               | hypothetical protein, MYPE7910 paralog                                                         |
| CDS | MYPE7930 | - |               | hypothetical protein, MYPE7910 paralog                                                         |
| CDS | MYPE7940 | J |               | conserved hypothetical protein                                                                 |
| CDS | MYPE7950 | - |               | conserved hypothetical protein                                                                 |
| CDS | MYPE7960 | J | <i>tyrS</i>   | tyrosyl-tRNA synthetase                                                                        |
| CDS | MYPE7970 | R |               | aldo/keto reductase family oxidoreductase, MYPE4720 paralog                                    |
| CDS | MYPE7980 | - |               | hypothetical protein                                                                           |
| CDS | MYPE7990 | M | <i>gidB</i>   | glucose-inhibited division protein                                                             |
| CDS | MYPE8000 | D |               | conserved hypothetical protein                                                                 |
| CDS | MYPE8010 | J | <i>proS</i>   | prolyl aminoacyl-tRNA synthetase                                                               |
| CDS | MYPE8020 | S |               | conserved hypothetical protein                                                                 |
| CDS | MYPE8030 | R | <i>deaD</i>   | ATP-dependent RNA helicase                                                                     |
| CDS | MYPE8040 | S |               | conserved hypothetical protein                                                                 |
| CDS | MYPE8050 | - |               | conserved hypothetical protein                                                                 |
| CDS | MYPE8060 | L | <i>recR</i>   | recombinational DNA repair protein                                                             |
| CDS | MYPE8070 | S |               | conserved hypothetical protein                                                                 |
| CDS | MYPE8080 | L | <i>dnaX</i>   | DNA polymerase III gamma-tau subunits                                                          |
| CDS | MYPE8090 | - |               | hypothetical protein                                                                           |
| CDS | MYPE8100 | - |               | hypothetical protein                                                                           |



|     |          |   |             |                                                                                                                                                                                                      |
|-----|----------|---|-------------|------------------------------------------------------------------------------------------------------------------------------------------------------------------------------------------------------|
| CDS | MYPE8110 | L |             | conserved hypothetical protein, similar to hydrolase of <i>Mycoplasma pneumoniae</i> AE000016 Expect=7.5e-42, Identities=37%, containing Pfam domain TatD related DNase<br>Accession number: PF01026 |
| CDS | MYPE8120 | R | <i>thdF</i> | thiophene and furan oxidation protein-related GTPase                                                                                                                                                 |
| CDS | MYPE8130 | L |             | predicted DNA polymerase                                                                                                                                                                             |
| CDS | MYPE8140 | F | <i>tmk</i>  | thymidylate kinase                                                                                                                                                                                   |
| CDS | MYPE8150 | R |             | conserved hypothetical protein                                                                                                                                                                       |
| CDS | MYPE8160 | G | <i>pgk</i>  | phosphoglycerate kinase                                                                                                                                                                              |
| CDS | MYPE8170 | G | <i>gap</i>  | glyceraldehyde-3-phosphate dehydrogenase                                                                                                                                                             |
| CDS | MYPE8180 | L |             | integrase/recombinase                                                                                                                                                                                |
| CDS | MYPE8190 | L | <i>hsdS</i> | type I restriction-modification system S subunit                                                                                                                                                     |
| CDS | MYPE8200 | L | <i>hsdS</i> | type I restriction-modification system S subunit                                                                                                                                                     |
| CDS | MYPE8210 | L | <i>hsdM</i> | type I restriction-modification system M subunit                                                                                                                                                     |
| CDS | MYPE8220 | L | <i>hsdR</i> | type I restriction-modification system R subunit                                                                                                                                                     |
| CDS | MYPE8230 | L | <i>hsdR</i> | type I restriction-modification system R subunit, partial                                                                                                                                            |
| CDS | MYPE8250 | J | <i>trmD</i> | tRNA-(5-methylaminomethyl-2-thiouridylate)<br>methyltransferase                                                                                                                                      |
| CDS | MYPE8260 | - |             | hypothetical protein                                                                                                                                                                                 |
| CDS | MYPE8270 | - |             | hypothetical protein, paralog family                                                                                                                                                                 |
| CDS | MYPE8280 | - |             | hypothetical protein, paralog of MYPE8270                                                                                                                                                            |
| CDS | MYPE8290 | - |             | hypothetical protein, paralog of MYPE8270                                                                                                                                                            |
| CDS | MYPE8300 | - |             | hypothetical protein, paralog of MYPE8270                                                                                                                                                            |
| CDS | MYPE8310 | - |             | hypothetical protein, predicted integral membrane protein                                                                                                                                            |
| CDS | MYPE8320 | - |             | conserved hypothetical protein, predicted integral membrane protein                                                                                                                                  |
| CDS | MYPE8330 | R | <i>pip</i>  | prolyl aminopeptidase                                                                                                                                                                                |
| CDS | MYPE8340 | S |             | conserved hypothetical protein                                                                                                                                                                       |
| CDS | MYPE8350 | R |             | conserved hypothetical protein                                                                                                                                                                       |
| CDS | MYPE8360 | K | <i>sigA</i> | RNA polymerase sigma factor, contains similarity to Pfam domain Sigma-70                                                                                                                             |
| CDS | MYPE8370 | D | <i>ftsZ</i> | cell division protein FtsZ                                                                                                                                                                           |
| CDS | MYPE8380 | - |             | conserved hypothetical protein                                                                                                                                                                       |
| CDS | MYPE8390 | - |             | conserved hypothetical protein                                                                                                                                                                       |
| CDS | MYPE8400 | - |             | conserved hypothetical protein                                                                                                                                                                       |
| CDS | MYPE8410 | - |             | conserved hypothetical protein                                                                                                                                                                       |
| CDS | MYPE8420 | J | <i>lysS</i> | lysyl-tRNA synthetase                                                                                                                                                                                |
| CDS | MYPE8430 | N |             | conserved hypothetical protein, MYPE8450 paralog                                                                                                                                                     |
| CDS | MYPE8440 | - |             | conserved hypothetical protein, MYPE8450 paralog                                                                                                                                                     |
| CDS | MYPE8450 | - |             | conserved hypothetical protein, paralog family                                                                                                                                                       |
| CDS | MYPE8460 | L |             | predicted ATP/GTP-binding protein                                                                                                                                                                    |
| CDS | MYPE8470 | - |             | conserved hypothetical protein, MYPE8480 paralog                                                                                                                                                     |
| CDS | MYPE8480 | - |             | conserved hypothetical protein, paralog family                                                                                                                                                       |
| CDS | MYPE8490 | - |             | conserved hypothetical protein, MYPE8450 paralog                                                                                                                                                     |
| CDS | MYPE8500 | O |             | protease                                                                                                                                                                                             |
| CDS | MYPE8510 | O |             | protease                                                                                                                                                                                             |
| CDS | MYPE8520 | - |             | predicted O-methyltransferase                                                                                                                                                                        |
| CDS | MYPE8530 | L |             | conserved hypothetical protein                                                                                                                                                                       |
| CDS | MYPE8540 | J | <i>alaS</i> | alanyl-tRNA synthetase                                                                                                                                                                               |
| CDS | MYPE8550 | E |             | putative lipoprotein, MYPE8600 paralog                                                                                                                                                               |
| CDS | MYPE8560 | R |             | haloacid dehalogenase-like hydrolase                                                                                                                                                                 |
| CDS | MYPE8570 | G | <i>potA</i> | spermidine/putrescine transport ATP-binding protein PotA                                                                                                                                             |
| CDS | MYPE8580 | E | <i>potB</i> | spermidine/putrescine transport system permease PotB                                                                                                                                                 |
| CDS | MYPE8590 | E | <i>potC</i> | spermidine/putrescine transport system permease PotC                                                                                                                                                 |
| CDS | MYPE8600 | E |             | putative lipoprotein, paralog family                                                                                                                                                                 |

|     |          |   |             |                                                                                            |
|-----|----------|---|-------------|--------------------------------------------------------------------------------------------|
| CDS | MYPE8610 | O | <i>gcp</i>  | o-sialoglycoprotein endopeptidase                                                          |
| CDS | MYPE8620 | - |             | conserved hypothetical protein                                                             |
| CDS | MYPE8630 | - |             | hypothetical protein                                                                       |
| CDS | MYPE8640 | - |             | predicted permease, predicted integral membrane protein                                    |
| CDS | MYPE8650 | H | <i>lplA</i> | lipoate protein ligase A                                                                   |
| CDS | MYPE8660 | P |             | Trk-type cation transport protein, predicted integral membrane protein                     |
| CDS | MYPE8670 | - |             | hypothetical protein                                                                       |
| CDS | MYPE8680 | D |             | conserved hypothetical protein                                                             |
| CDS | MYPE8690 | F |             | formate-tetrahydrofolate ligase                                                            |
| CDS | MYPE8700 | O |             | endopeptidase                                                                              |
| CDS | MYPE8710 | P |             | heavy-metal transporting P-type ATPase                                                     |
| CDS | MYPE8720 | P |             | heavy-metal transporting ATPase, partial                                                   |
| CDS | MYPE8730 | - |             | hypothetical protein                                                                       |
| CDS | MYPE8750 | R | <i>oppF</i> | oligopeptide ABC transporter ATP-binding protein                                           |
| CDS | MYPE8760 | R | <i>oppD</i> | oligopeptide ABC transporter ATP-binding protein                                           |
| CDS | MYPE8770 | E | <i>oppC</i> | oligopeptide ABC transporter permease protein                                              |
| CDS | MYPE8780 | E | <i>oppB</i> | oligopeptide ABC transporter permease protein                                              |
| CDS | MYPE8790 | - |             | hypothetical protein                                                                       |
| CDS | MYPE8800 | - |             | hypothetical protein                                                                       |
| CDS | MYPE8810 | - |             | hypothetical protein                                                                       |
| CDS | MYPE8820 | J | <i>ileS</i> | isoleucyl-tRNA synthetase                                                                  |
| CDS | MYPE8830 | M |             | putative glycosyltransferase                                                               |
| CDS | MYPE8840 | K | <i>nusG</i> | transcription antitermination factor                                                       |
| CDS | MYPE8850 | N | <i>secE</i> | predicted preprotein translocase subunit SecE                                              |
| CDS | MYPE8860 | - |             | conserved hypothetical protein                                                             |
| CDS | MYPE8870 | S |             | conserved hypothetical protein                                                             |
| CDS | MYPE8880 | R |             | conserved hypothetical protein                                                             |
| CDS | MYPE8890 | L | <i>uvrB</i> | excinuclease ABC subunit B                                                                 |
| CDS | MYPE8900 | S |             | conserved hypothetical protein                                                             |
| CDS | MYPE8910 | L |             | ATP-dependent DNA helicase                                                                 |
| CDS | MYPE8920 | - |             | conserved hypothetical protein                                                             |
| CDS | MYPE8930 | M |             | glycosyltransferase                                                                        |
| CDS | MYPE8940 | - |             | hypothetical protein                                                                       |
| CDS | MYPE8950 | E |             | cytosol aminopeptidase                                                                     |
| CDS | MYPE8960 | O | <i>grpE</i> | heat shock protein GrpE                                                                    |
| CDS | MYPE8970 | O | <i>dnaJ</i> | heat shock protein DnaJ                                                                    |
| CDS | MYPE8980 | T |             | phosphotyrosine protein phosphatase                                                        |
| CDS | MYPE8990 | C |             | NADH-dependent flavin oxidoreductase                                                       |
| CDS | MYPE9000 | Q |             | conserved hypothetical protein                                                             |
| CDS | MYPE9010 | - |             | hypothetical protein                                                                       |
| CDS | MYPE9020 | - |             | conserved hypothetical protein                                                             |
| CDS | MYPE9030 | J | <i>cysS</i> | cysteinyl-tRNA synthetase                                                                  |
| CDS | MYPE9040 | L |             | helicase with SNF2 domain                                                                  |
| CDS | MYPE9050 | R |             | conserved hypothetical protein                                                             |
| CDS | MYPE9060 | T |             | serine/threonine protein kinase                                                            |
| CDS | MYPE9070 | - |             | hypothetical protein, MYPE950 paralog                                                      |
| CDS | MYPE9080 | - |             | hypothetical protein, MYPE950 paralog                                                      |
| CDS | MYPE9090 | - |             | hypothetical protein                                                                       |
| CDS | MYPE9100 | L | <i>uvrA</i> | excinuclease ABC subunit A                                                                 |
| CDS | MYPE9110 | - |             | conserved hypothetical protein, similar to Pfam domain pertussis toxin subunit S1, PF02917 |
| CDS | MYPE9120 | C |             | flavodoxin                                                                                 |
| CDS | MYPE9130 | - |             | hypothetical protein                                                                       |
| CDS | MYPE9150 | J | <i>rpLT</i> | ribosomal protein L20                                                                      |
| CDS | MYPE9160 | J | <i>infC</i> | translation initiation factor IF3                                                          |

|      |           |   |             |                                                                              |
|------|-----------|---|-------------|------------------------------------------------------------------------------|
| CDS  | MYPE9170  | L | <i>polC</i> | DNA polymerase III subunit alpha                                             |
| CDS  | MYPE9180  | J | <i>rpsU</i> | ribosomal protein S21                                                        |
| CDS  | MYPE9190  | - |             | hypothetical protein                                                         |
| CDS  | MYPE9200  | J | <i>rpmF</i> | ribosomal protein L32                                                        |
| rRNA | MYPE20000 |   |             | 5S ribosomal RNA gene, putative 3'-end                                       |
| rRNA | MYPE20010 |   |             | 23S ribosomal RNA gene, putative 3'-end                                      |
| rRNA | MYPE20020 |   |             | 16S ribosomal RNA gene, reported                                             |
| CDS  | MYPE9240  | - |             | hypothetical protein                                                         |
| CDS  | MYPE9250  | - |             | hypothetical protein                                                         |
| CDS  | MYPE9260  | J | <i>pheT</i> | phenylalanyl-tRNA synthetase subunit beta                                    |
| CDS  | MYPE9270  | J | <i>pheS</i> | phenylalanyl-tRNA synthetase subunit alpha                                   |
| CDS  | MYPE9280  | J | <i>truB</i> | tRNA pseudouridine 5S synthase                                               |
| CDS  | MYPE9290  | - |             | hypothetical protein                                                         |
| CDS  | MYPE9300  | R |             | esterase/lipase 2                                                            |
| CDS  | MYPE9310  | H |             | riboflavin kinase/FAD synthetase                                             |
| CDS  | MYPE9320  | - |             | hypothetical protein                                                         |
| CDS  | MYPE9330  | O | <i>trxB</i> | thioredoxin reductase                                                        |
| CDS  | MYPE9340  | P | <i>phoU</i> | phosphate transport system regulatory protein                                |
| CDS  | MYPE9350  | P | <i>pstB</i> | phosphate ABC transporter permease PstB, MYPE3080<br>paralog                 |
| CDS  | MYPE9360  | P | <i>pstA</i> | phosphate ABC transporter permease PstA                                      |
| CDS  | MYPE9370  | P |             | predicted phosphate binding protein PstS                                     |
| CDS  | MYPE9380  | J | <i>metS</i> | methionyl-tRNA synthetase                                                    |
| CDS  | MYPE9390  | C |             | phosphoenolpyruvate carboxylase                                              |
| CDS  | MYPE9400  | M |             | peptidoglycan acetylation                                                    |
| CDS  | MYPE9410  | R |             | conserved hypothetical protein                                               |
| CDS  | MYPE9420  | H |             | conserved hypothetical protein                                               |
| CDS  | MYPE9430  | R |             | conserved hypothetical protein                                               |
| CDS  | MYPE9440  | L |             | predicted nucleotidyltransferase                                             |
| CDS  | MYPE9450  | F |             | phosphoribosylpyrophosphate synthetase                                       |
| CDS  | MYPE9460  | R |             | ribonuclease H-related protein                                               |
| CDS  | MYPE9470  | - |             | conserved hypothetical protein                                               |
| CDS  | MYPE9480  | - |             | predicted choline kinase                                                     |
| CDS  | MYPE9490  | O | <i>dnaK</i> | chaperone protein DnaK/ heat shock protein 70                                |
| CDS  | MYPE9500  | R |             | oxidoreductase, aldo/keto reductase family, MYPE4720<br>paralog              |
| CDS  | MYPE9510  | - |             | hypothetical protein                                                         |
| CDS  | MYPE9520  | D |             | hypothetical protein                                                         |
| CDS  | MYPE9530  | L |             | probable DNA polymerase III                                                  |
| CDS  | MYPE9540  | I |             | CDP-diglyceride synthetase                                                   |
| CDS  | MYPE9550  | I |             | undecaprenyl diphosphate synthase                                            |
| CDS  | MYPE9560  | J | <i>frr</i>  | ribosome releasing/ recycling factor                                         |
| CDS  | MYPE9570  | F | <i>pyrH</i> | uridylyate kinase                                                            |
| CDS  | MYPE9580  | J | <i>tsf</i>  | elongation factor Ts                                                         |
| CDS  | MYPE9600  | - |             | hypothetical protein, predicted integral membrane protein,<br>paralog family |
| CDS  | MYPE9610  | - |             | hypothetical protein, paralog of MYPE9600 (C-terminal)                       |
| CDS  | MYPE9620  | L |             | transposase                                                                  |
| CDS  | MYPE9630  | - |             | hypothetical protein, paralog of MYPE9600 (N-terminal)                       |
| CDS  | MYPE9640  | C |             | L-lactate dehydrogenase                                                      |
| CDS  | MYPE9650  | H |             | putative lipopolysaccharide biosynthesis enzyme KdtB                         |
| CDS  | MYPE9660  | J | <i>rpsB</i> | ribosomal protein S2                                                         |
| CDS  | MYPE9670  | K |             | transcription regulation proteins GntR                                       |
| CDS  | MYPE9680  | G |             | PTS system sucrose-specific IIABC component                                  |
| CDS  | MYPE9690  | G |             | sucrose-6-phosphate hydrolase                                                |
| CDS  | MYPE9700  | K |             | ROK family-glucose kinase or transcriptional regulator                       |

|     |           |   |             |                                                                                          |
|-----|-----------|---|-------------|------------------------------------------------------------------------------------------|
| CDS | MYPE9710  | R |             | conserved hypothetical protein                                                           |
| CDS | MYPE9720  | - |             | hypothetical protein                                                                     |
| CDS | MYPE9730  | - |             | hypothetical protein                                                                     |
| CDS | MYPE9740  | J | <i>hisT</i> | tRNA pseudouridine synthase                                                              |
| CDS | MYPE9750  | P |             | cobalt transport membrane protein                                                        |
| CDS | MYPE9760  | P |             | cobalt transport ATP-binding protein                                                     |
| CDS | MYPE9770  | P |             | cobalt transport ATP-binding protein, MYPE3080 paralog                                   |
| CDS | MYPE9780  | L |             | transposase for IS1630-like insertion sequence element                                   |
| CDS | MYPE9790  | - |             | hypothetical protein, similar to endonuclease                                            |
| CDS | MYPE9800  | L |             | cytosine-specific DNA methylase                                                          |
| CDS | MYPE9810  | - |             | hypothetical protein                                                                     |
| CDS | MYPE9820  | - |             | conserved hypothetical protein                                                           |
| CDS | MYPE9830  | - |             | hypothetical protein                                                                     |
| CDS | MYPE9840  | - |             | hypothetical protein, paralog of MYPE9860 and MYPE8270                                   |
| CDS | MYPE9850  | - |             | hypothetical protein, paralog of MYPE9860 and MYPE8270                                   |
| CDS | MYPE9860  | - |             | hypothetical protein, MYPE8270 paralog                                                   |
| CDS | MYPE9870  | Q |             | short-chain alcohol dehydrogenase family enzyme                                          |
| CDS | MYPE9880  | - |             | hypothetical protein                                                                     |
| CDS | MYPE9890  | E | <i>pepC</i> | aminopeptidase C                                                                         |
| CDS | MYPE9900  | E | <i>pepC</i> | aminopeptidase C                                                                         |
| CDS | MYPE9910  | J | <i>rpsQ</i> | ribosomal protein L17                                                                    |
| CDS | MYPE9920  | K | <i>rpoA</i> | RNA polymerase subunit alpha                                                             |
| CDS | MYPE9930  | J | <i>rpsK</i> | ribosomal protein S11                                                                    |
| CDS | MYPE9940  | J | <i>rpsM</i> | ribosomal protein S13                                                                    |
| CDS | MYPE9950  | J | <i>infA</i> | translation initiation factor IF-1                                                       |
| CDS | MYPE9960  | J | <i>map</i>  | methionine aminopeptidase                                                                |
| CDS | MYPE9970  | F | <i>adk</i>  | adenylate kinase                                                                         |
| CDS | MYPE9980  | N | <i>secY</i> | preprotein translocase SecY                                                              |
| CDS | MYPE9990  | J | <i>rplO</i> | ribosomal protein L15                                                                    |
| CDS | MYPE10000 | J | <i>rpsE</i> | ribosomal protein S5                                                                     |
| CDS | MYPE10010 | J | <i>rplR</i> | ribosomal protein L18                                                                    |
| CDS | MYPE10020 | J | <i>rplF</i> | ribosomal protein L6                                                                     |
| CDS | MYPE10030 | J | <i>rpsH</i> | ribosomal protein S8                                                                     |
| CDS | MYPE10040 | J | <i>rpsN</i> | ribosomal protein S14                                                                    |
| CDS | MYPE10050 | J | <i>rplE</i> | ribosomal protein L5                                                                     |
| CDS | MYPE10060 | J | <i>rplX</i> | ribosomal protein L24                                                                    |
| CDS | MYPE10070 | J | <i>rplN</i> | ribosomal protein L14                                                                    |
| CDS | MYPE10080 | J | <i>rpsQ</i> | ribosomal protein S17                                                                    |
| CDS | MYPE10090 | J | <i>rpsC</i> | ribosomal protein S3                                                                     |
| CDS | MYPE10100 | J | <i>rpmC</i> | ribosomal protein L29                                                                    |
| CDS | MYPE10110 | J | <i>rplP</i> | ribosomal protein L16                                                                    |
| CDS | MYPE10120 | J | <i>rplV</i> | ribosomal protein L22                                                                    |
| CDS | MYPE10130 | J | <i>rpsS</i> | ribosomal protein S19                                                                    |
| CDS | MYPE10150 | J | <i>rplB</i> | ribosomal protein L2                                                                     |
| CDS | MYPE10160 | J | <i>rplW</i> | ribosomal protein L23                                                                    |
| CDS | MYPE10170 | J | <i>rplD</i> | ribosomal protein L4                                                                     |
| CDS | MYPE10180 | J | <i>rplC</i> | ribosomal protein L3                                                                     |
| CDS | MYPE10190 | J | <i>rpsJ</i> | ribosomal protein S10                                                                    |
| CDS | MYPE10200 | R |             | haloacid dehalogenase-like hydrolase                                                     |
| CDS | MYPE10210 | K |             | predicted transcriptional regulator, similar to Pfam domain Bvg accessory factor PF03309 |
| CDS | MYPE10220 | L | <i>rnhB</i> | ribonuclease HII                                                                         |
| CDS | MYPE10230 | F | <i>apt</i>  | adenine phosphoribosyltransferase                                                        |
| CDS | MYPE10240 | N |             | predicted protein-export membrane protein SecD                                           |
| CDS | MYPE10250 | O | <i>ftsH</i> | cell division protein FtsH                                                               |
| CDS | MYPE10260 | F | <i>hpt</i>  | hypoxanthine-guanine phosphoribosyltransferase                                           |

|      |           |   |             |                                                                                             |
|------|-----------|---|-------------|---------------------------------------------------------------------------------------------|
| CDS  | MYPE10270 | I |             | putative enzyme of deoxy-xylulose pathway YgbB, similar to YacN of <i>Bacillus subtilis</i> |
| CDS  | MYPE10280 | R |             | ABC transporter ATP-binding protein, MYPE3080 paralog                                       |
| CDS  | MYPE10290 | R |             | probably ABC transporter membrane protein                                                   |
| CDS  | MYPE10300 | F | <i>upp</i>  | uracil phosphoribosyltransferase                                                            |
| CDS  | MYPE10310 | F |             | GMP reductase, guanosine 5'-monophosphate oxidoreductase                                    |
| CDS  | MYPE10320 | F | <i>tdk</i>  | thymidine kinase                                                                            |
| CDS  | MYPE10330 | R |             | GTP-binding protein                                                                         |
| CDS  | MYPE10340 | G |             | fructose-bisphosphate aldolase                                                              |
| CDS  | MYPE10350 | K | <i>rpoE</i> | DNA-directed RNA polymerase subunit delta                                                   |
| CDS  | MYPE10360 | R |             | conserved hypothetical protein                                                              |
| CDS  | MYPE10370 | J | <i>gltX</i> | glutamyl-tRNA synthetase                                                                    |
| CDS  | MYPE10380 | I |             | putative GHMP kinases ATP-binding protein                                                   |
| CDS  | MYPE10390 | J | <i>ksgA</i> | dimethyladenosine transferase                                                               |
| CDS  | MYPE10400 | N |             | similar to SpoIIIJ of <i>Bacillus subtilis</i>                                              |
| CDS  | MYPE10410 | J | <i>rnpA</i> | ribonuclease P protein component                                                            |
| CDS  | MYPE10420 | J | <i>rpmH</i> | ribosomal protein L34                                                                       |
| tRNA | MYPE20030 |   |             | tRNA-Arg                                                                                    |
| tRNA | MYPE20040 |   |             | tRNA-Asn                                                                                    |
| tRNA | MYPE20050 |   |             | tRNA-Glu                                                                                    |
| tRNA | MYPE20060 |   |             | tRNA-Val                                                                                    |
| tRNA | MYPE20070 |   |             | tRNA-Thr                                                                                    |
| tRNA | MYPE20080 |   |             | tRNA-Lys                                                                                    |
| tRNA | MYPE20090 |   |             | tRNA-Leu                                                                                    |
| tRNA | MYPE20100 |   |             | tRNA-Ser                                                                                    |
| tRNA | MYPE20110 |   |             | tRNA-Ile                                                                                    |
| tRNA | MYPE20120 |   |             | tRNA-Ala                                                                                    |
| tRNA | MYPE20130 |   |             | tRNA-Arg                                                                                    |
| tRNA | MYPE20140 |   |             | tRNA-Cys                                                                                    |
| tRNA | MYPE20150 |   |             | tRNA-Arg                                                                                    |
| tRNA | MYPE20160 |   |             | tRNA-Pro                                                                                    |
| tRNA | MYPE20170 |   |             | tRNA-Met                                                                                    |
| tRNA | MYPE20180 |   |             | tRNA-Met                                                                                    |
| tRNA | MYPE20190 |   |             | tRNA-Ser                                                                                    |
| tRNA | MYPE20200 |   |             | tRNA-Met                                                                                    |
| tRNA | MYPE20210 |   |             | tRNA-Asp                                                                                    |
| tRNA | MYPE20220 |   |             | tRNA-Phe                                                                                    |
| tRNA | MYPE20230 |   |             | tRNA-Tyr                                                                                    |
| tRNA | MYPE20240 |   |             | tRNA-Gln                                                                                    |
| tRNA | MYPE20250 |   |             | tRNA-Lys                                                                                    |
| tRNA | MYPE20260 |   |             | tRNA-Leu                                                                                    |
| tRNA | MYPE20270 |   |             | tRNA-Gly                                                                                    |
| tRNA | MYPE20280 |   |             | tRNA-Leu                                                                                    |
| tRNA | MYPE20290 |   |             | tRNA-Gly                                                                                    |
| tRNA | MYPE20300 |   |             | tRNA-Trp                                                                                    |
| tRNA | MYPE20310 |   |             | tRNA-His                                                                                    |
| tRNA | MYPE20320 |   |             | tRNA-SeC                                                                                    |
